# Supplementary material for: Radially patterned cell behaviours during tube budding from an epithelium
Source: eLife. 2018 Jul 17;7:e35717. doi: 10.7554/eLife.35717 (PMC6089598; doi:10.7554/eLife.35717)
Supplement: Figure 1—source data 1. — Related to Figure 1G. [file elife-35717-fig1-data1.xlsx]

## Sheet: H
Figure 1H	Cumulative area change (pp per min)
	Time	radial stripe 1	radial stripe 2	radial stripe 3	radial stripe 4	radial stripe 5
	-13.75	0.971	0.9804	0.9988	0.9979	0.9668
	-11.25	0.9222	0.9604	0.9799	1.0119	0.9831
	-8.75	0.8746	0.9381	0.9734	1.0143	0.9793
	-6.25	0.8409	0.9196	0.9647	1.024	0.9943
	-3.75	0.7973	0.9198	0.9567	1.0341	0.9952
	-1.25	0.7404	0.9031	0.9576	1.0354	1.001
	1.25	0.6947	0.8994	0.9559	1.0288	0.9911
	3.75	0.6501	0.8654	0.9526	1.0397	0.987
	6.25	0.6103	0.8397	0.9566	1.0462	1.008
	8.75	0.5815	0.8232	0.943	1.0524	1.0318
	11.25	0.5483	0.7888	0.9213	1.0522	1.0427
	13.75	0.5446	0.7685	0.9036	1.0313	1.0544
