# Supplementary material for: Radially patterned cell behaviours during tube budding from an epithelium
Source: eLife. 2018 Jul 17;7:e35717. doi: 10.7554/eLife.35717 (PMC6089598; doi:10.7554/eLife.35717)
Supplement: Figure 2—figure supplement 1—source data 1. — Related to Figure 2—figure supplement 1C,D and E. [file elife-35717-fig2-figsupp1-data1.xlsx]

## Sheet: C
Figure Suppl 2C	Cumulative strain rate for all cells [rad]
	Time	Tissue SRT	Cell Shape SRT	Intercalation SRT
	-16.5	1.0142	1.005	1.0043
	-13.5	1.0105	1.003	1.0044
	-10.5	1.014	0.9988	1.0084
	-7.5	1.0116	0.9871	1.0149
	-4.5	1.014	0.9834	1.0188
	-1.5	1.0197	0.9781	1.0279
	1.5	1.0182	0.9699	1.0348
	4.5	1.0192	0.961	1.0433
	7.5	1.028	0.9587	1.0547
	10.5	1.0378	0.9599	1.0616
	13.5	1.0379	0.9554	1.0678
	16.5	1.0583	0.9566	1.0825

## Sheet: C dash
Figure Suppl 2C'	Cumulative strain rate for all cells [cir]
	Time	Tissue SRT	Cell Shape SRT	Intercalation SRT
	-16.5	0.985	0.9891	0.9957
	-13.5	0.972	0.9783	0.9956
	-10.5	0.9546	0.9636	0.9917
	-7.5	0.9442	0.9579	0.9853
	-4.5	0.93	0.9481	0.9816
	-1.5	0.9151	0.942	0.9729
	1.5	0.9019	0.9352	0.9663
	4.5	0.8863	0.9276	0.9585
	7.5	0.8735	0.9271	0.9481
	10.5	0.8508	0.9119	0.942
	13.5	0.8366	0.9057	0.9365
	16.5	0.8138	0.8927	0.9238

## Sheet: D
Figure Suppl 2D	Instantaneous strain rate (pp per min) for cells near to pit [rad]
		Tissue SRT				Cell shape SRT				Intercalation SRT
	Time	lower CI	Mean	upper CI	N	lower CI	Mean	upper CI	N	lower CI	Mean	upper CI	N
	-18	-0.000509337	0.00238671	0.00528276	123	-0.00234407	0.000245426	0.00283492	123	-0.00184088	0.000293599	0.00242808	123
	-13.5	-0.00736353	-0.00524092	-0.00311831	599	-0.0053949	-0.00374313	-0.00209135	599	-0.00306264	-0.00152414	1.43722e-05	599
	-9	-0.00481928	-0.00244117	-6.30676e-05	724	-0.00600974	-0.00409501	-0.00218027	724	-0.000667487	0.00100562	0.00267873	724
	-4.5	-0.00449405	-0.00235975	-0.000225444	1132	-0.00705417	-0.00527183	-0.0034895	1132	0.00111053	0.00251068	0.00391083	1132
	0	-0.00851111	-0.00591421	-0.00331731	980	-0.0079306	-0.0056926	-0.00345459	980	-0.00168522	9.30712e-06	0.00170383	980
	4.5	-0.011694	-0.00916265	-0.00663126	737	-0.0124757	-0.0104544	-0.00843307	737	-0.000219487	0.0015451	0.0033097	737
	9	-0.0113742	-0.00790563	-0.0044371	468	-0.0106824	-0.00791846	-0.00515454	468	-0.00105409	0.00156963	0.00419334	468
	13.5	-0.0110975	-0.00740039	-0.00370326	219	-0.0065682	-0.00365341	-0.000738618	219	-0.00403314	-0.00145114	0.00113086	219
	18	-0.00904	-0.00328865	0.00246271	80	-0.0125968	-0.00836167	-0.00412653	80	-0.00156937	0.00234053	0.00625043	80

## Sheet: D stats
Figure Suppl 2D	Statistics for instantaneous strain rate (pp per min) for cells near to pit [rad]
	Tissue SRT compared to Cell Shape SRT				Tissue SRT compared to Intercalation SRT
		Time	pvalues			Time	pvalues
		-18	0.497624			-18	0.402758
		-13.5	0.388524			-13.5	0.000898151
		-9	0.00384064			-9	1.17698e-06
		-4.5	0.000903482			-4.5	1.57311e-09
		0	0.653671			0	1.02829e-07
		4.5	0.601621			4.5	2.12823e-13
		9	0.22799			9	0.000191535
		13.5	0.321329			13.5	0.352044
		18	0.0951591			18	0.346518

## Sheet: D dash
Figure Suppl 2D'	Instantaneous strain rate (pp per min) for cells near to pit [cir]
		Tissue SRT				Cell shape SRT				Intercalation SRT
	Time	lower CI	Mean	upper CI	N	lower CI	Mean	upper CI	N	lower CI	Mean	upper CI	N
	-18	-0.00781256	-0.00484242	-0.00187228	123	-0.00798868	-0.00546502	-0.00294136	123	-0.00242808	-0.000293599	0.00184088	123
	-13.5	-0.00861725	-0.00660373	-0.00459021	599	-0.00940918	-0.00781133	-0.00621347	599	-1.44e-05	0.00152413	0.00306264	599
	-9	-0.00716778	-0.00476636	-0.00236494	724	-0.00621471	-0.00401846	-0.00182221	724	-0.00267873	-0.00100562	0.000667487	724
	-4.5	-0.0110279	-0.00889142	-0.006755	1132	-0.00754424	-0.00585661	-0.00416899	1132	-0.00391083	-0.00251068	-0.00111053	1132
	0	-0.00940247	-0.00709888	-0.00479529	980	-0.0089041	-0.00694894	-0.00499378	980	-0.00170383	-9.31e-06	0.00168522	980
	4.5	-0.0128388	-0.0103277	-0.00781661	737	-0.0101224	-0.00796718	-0.00581197	737	-0.0033097	-0.00154511	0.000219484	737
	9	-0.0130079	-0.0098463	-0.00668469	468	-0.00966723	-0.00707842	-0.00448961	468	-0.00419334	-0.00156963	0.00105409	468
	13.5	-0.0151512	-0.0115033	-0.0078553	219	-0.0125237	-0.00961928	-0.00671482	219	-0.00113086	0.00145114	0.00403314	219
	18	-0.0199499	-0.0146294	-0.00930885	80	-0.0169928	-0.01363	-0.0102672	80	-0.00625043	-0.00234053	0.00156937	80

## Sheet: D dash stats
Figure Suppl 2D'	Statistics for instantaneous strain rate (pp per min) for cells near to pit [cir]
	Tissue SRT compared to Cell Shape SRT				Tissue SRT compared to Intercalation SRT
		Time	pvalues			Time	pvalues
		-18	0.814175			-18	0.0899894
		-13.5	0.675133			-13.5	1.6e-13
		-9	0.0391909			-9	1.66e-05
		-4.5	0.00127549			-4.5	8.4e-11
		0	0.232104			0	6.34e-12
		4.5	0.0443325			4.5	7.07e-14
		9	0.00371986			9	8.17e-06
		13.5	0.419355			13.5	1.11e-06
		18	0.190337			18	0.000566399

## Sheet: E
Figure Suppl 2E	Instantaneous strain rate (pp per min) for cells far from pit [rad]
		Tissue SRT				Cell shape SRT				Intercalation SRT
	Time	lower CI	Mean	upper CI	N	lower CI	Mean	upper CI	N	lower CI	Mean	upper CI	N
	-18	0.00569551	0.00861365	0.0115318	156	0.000313309	0.0030016	0.00568989	156	0.00257294	0.00436884	0.00616475	156
	-13.5	-0.00039261	0.00166812	0.00372884	837	-0.00138623	0.000326817	0.00203987	837	-0.0005494	0.000834817	0.00221903	837
	-9	-0.000328409	0.00148676	0.00330193	1183	-0.00254491	-0.00102063	0.000503652	1183	-0.000421655	0.000878624	0.0021789	1183
	-4.5	0.00243983	0.00399633	0.00555283	1880	-5.18e-05	0.0012382	0.00252817	1880	0.000584285	0.00163995	0.00269562	1880
	0	0.0013418	0.00305449	0.00476717	1731	-0.00187039	-0.000476443	0.000917506	1731	0.00221093	0.003336	0.00446106	1731
	4.5	0.00189306	0.0036101	0.00532714	1484	-0.00224444	-0.000956087	0.000332262	1484	0.00219696	0.00333719	0.00447741	1484
	9	0.00328819	0.00509718	0.00690616	1151	-0.000417964	0.00104252	0.002503	1151	0.00161366	0.00288926	0.00416486	1151
	13.5	-0.00226221	-0.000171699	0.00191881	744	-0.00301887	-0.00130241	0.000414044	744	0.000322459	0.00164744	0.00297243	744
	18	0.00400194	0.00658939	0.00917685	319	-0.00104163	0.00116161	0.00336486	319	0.00205537	0.00404	0.00602463	319

## Sheet: E stats
Figure Suppl 2E	Statistics for instantaneous strain rate (pp per min) for cells far from pit [rad]
	Tissue SRT compared to Cell Shape SRT				Tissue SRT compared to Intercalation SRT
		Time	pvalues			Time	pvalues
		-18	0.225747			-18	0.00635729
		-13.5	0.29919			-13.5	0.260245
		-9	0.000843809			-9	0.441882
		-4.5	0.000884143			-4.5	0.000151073
		0	4.85e-09			0	0.116852
		4.5	2.24e-08			4.5	0.0889316
		9	1.98e-05			9	0.000509964
		13.5	0.0252965			13.5	0.222017
		18	0.000412416			18	0.0305771

## Sheet: E dash
Figure Suppl 2E'	Instantaneous strain rate (pp per min) for cells far from pit [cir]
		Tissue SRT				Cell shape SRT				Intercalation SRT
	Time	lower CI	Mean	upper CI	N	lower CI	Mean	upper CI	N	lower CI	Mean	upper CI	N
	-18	-0.00921897	-0.00656169	-0.00390441	156	-0.00363236	-0.00117838	0.0012756	156	-0.00616475	-0.00436885	-0.00257294	156
	-13.5	-0.00440353	-0.00265691	-0.000910289	837	-0.0035509	-0.00208169	-0.000612471	837	-0.00221904	-0.000834819	0.000549398	837
	-9	-0.00365104	-0.00194316	-0.000235286	1183	-0.00396016	-0.00249672	-0.00103328	1183	-0.0021789	-0.000878624	0.000421655	1183
	-4.5	-0.00426031	-0.00281676	-0.00137322	1880	-0.00230275	-0.00110226	9.82e-05	1880	-0.00269562	-0.00163995	-0.000584287	1880
	0	-0.00559956	-0.0040317	-0.00246384	1731	-0.00145005	-0.000155256	0.00113954	1731	-0.00446106	-0.003336	-0.00221093	1731
	4.5	-0.00338535	-0.00192366	-0.000461967	1484	-0.000633528	0.000739299	0.00211212	1484	-0.00447741	-0.00333719	-0.00219696	1484
	9	-0.00690072	-0.00536339	-0.00382606	1151	-0.00361395	-0.00217558	-0.000737215	1151	-0.00416486	-0.00288926	-0.00161366	1151
	13.5	-0.00631987	-0.00460777	-0.00289566	744	-0.00337797	-0.00192106	-0.000464145	744	-0.00297243	-0.00164744	-0.00032246	744
	18	-0.0134182	-0.0107106	-0.008003	319	-0.00870101	-0.0066174	-0.00453379	319	-0.00602462	-0.00404	-0.00205537	319

## Sheet: E dash stats
Figure Suppl 2E'	Statistics for instantaneous strain rate (pp per min) for cells far from pit [cir]
	Tissue SRT compared to Cell Shape SRT				Tissue SRT compared to Intercalation SRT
		Time	pvalues			Time	pvalues
		-18	0.277245			-18	0.585417
		-13.5	0.341702			-13.5	0.0290282
		-9	0.683023			-9	0.195384
		-4.5	0.0182515			-4.5	0.0265794
		0	6.94734e-11			0	0.65928
		4.5	3.30892e-05			4.5	0.262611
		9	3.76656e-05			9	0.000236879
		13.5	0.000537969			13.5	0.00212355
		18	0.0126704			18	0.040065
