# Supplementary material for: Radially patterned cell behaviours during tube budding from an epithelium
Source: eLife. 2018 Jul 17;7:e35717. doi: 10.7554/eLife.35717 (PMC6089598; doi:10.7554/eLife.35717)
Supplement: Figure 2—source data 1. — Related to Figure 2D–E. [file elife-35717-fig2-data1.xlsx]

## Sheet: D
Figure 2D	Cumulative strain rate for cells near to pit [rad]
	Time	Tissue SRT	Cell Shape SRT	Intercalation SRT
	-18	1.0108	1.0011	1.0013
	-13.5	0.9872	0.9844	0.9945
	-9	0.9765	0.9664	0.999
	-4.5	0.9661	0.9438	1.0103
	0	0.9408	0.9199	1.0104
	4.5	0.9028	0.8776	1.0174
	9	0.8712	0.8469	1.0246
	13.5	0.8427	0.8331	1.018
	18	0.8303	0.8023	1.0288

## Sheet: D stats
Figure 2D	Statistics for instantaneous strain rate (pp per min) for cells near to pit [rad]
	Tissue SRT compared to Cell Shape SRT				Tissue SRT compared to Intercalation SRT
		Time	pvalues			Time	pvalues
		-18	0.497624			-18	0.402758
		-13.5	0.388524			-13.5	0.000898151
		-9	0.00384064			-9	1.17698e-06
		-4.5	0.000903482			-4.5	1.57311e-09
		0	0.653671			0	1.02829e-07
		4.5	0.601621			4.5	2.12823e-13
		9	0.22799			9	0.000191535
		13.5	0.321329			13.5	0.352044
		18	0.0951591			18	0.346518

## Sheet: D dash
Figure 2D'	Cumulative strain rate for cells near to pit [cir]
	Time	Tissue SRT	Cell Shape SRT	Intercalation SRT
	-18	0.9784	0.9757	0.9987
	-13.5	0.9498	0.942	1.0056
	-9	0.9296	0.9251	1.001
	-4.5	0.8932	0.9011	0.9898
	0	0.8651	0.8733	0.9897
	4.5	0.8258	0.8426	0.9829
	9	0.79	0.8162	0.9759
	13.5	0.7502	0.7816	0.9823
	18	0.7024	0.7351	0.9721

## Sheet: D dash stats
Figure 2D'	Statistics for instantaneous strain rate (pp per min) for cells near to pit [cir]
	Tissue SRT compared to Cell Shape SRT				Tissue SRT compared to Intercalation SRT
		Time	pvalues			Time	pvalues
		-18	0.814175			-18	0.0899894
		-13.5	0.675133			-13.5	1.6e-13
		-9	0.0391909			-9	1.66e-05
		-4.5	0.00127549			-4.5	8.4e-11
		0	0.232104			0	6.34e-12
		4.5	0.0443325			4.5	7.07e-14
		9	0.00371986			9	8.17e-06
		13.5	0.419355			13.5	1.11e-06
		18	0.190337			18	0.000566399

## Sheet: E
Figure 2E	Cumulative strain rate for cells far from pit [rad]
	Time	Tissue SRT	Cell Shape SRT	Intercalation SRT
	-18	1.0395	1.0136	1.0199
	-13.5	1.0474	1.0151	1.0237
	-9	1.0544	1.0104	1.0277
	-4.5	1.0735	1.0161	1.0354
	0	1.0884	1.0139	1.051
	4.5	1.1062	1.0096	1.0669
	9	1.1319	1.0143	1.0809
	13.5	1.131	1.0084	1.0889
	18	1.165	1.0137	1.1089

## Sheet: E stats
Figure 2E	Statistics for instantaneous strain rate (pp per min) for cells far from pit [rad]
	Tissue SRT compared to Cell Shape SRT				Tissue SRT compared to Intercalation SRT
		Time	pvalues			Time	pvalues
		-18	0.225747			-18	0.00635729
		-13.5	0.29919			-13.5	0.260245
		-9	0.000843809			-9	0.441882
		-4.5	0.000884143			-4.5	0.000151073
		0	4.85e-09			0	0.116852
		4.5	2.24e-08			4.5	0.0889316
		9	1.98e-05			9	0.000509964
		13.5	0.0252965			13.5	0.222017
		18	0.000412416			18	0.0305771

## Sheet: E dash
Figure 2E'	Cumulative strain rate for cells far from pit [cir]
	Time	Tissue SRT	Cell Shape SRT	Intercalation SRT
	-18	0.9709	0.9947	0.9805
	-13.5	0.9594	0.9854	0.9769
	-9	0.951	0.9744	0.973
	-4.5	0.939	0.9696	0.9658
	0	0.9222	0.9689	0.9515
	4.5	0.9142	0.9722	0.9373
	9	0.8924	0.9627	0.9252
	13.5	0.8741	0.9544	0.9183
	18	0.833	0.9264	0.9018

## Sheet: E dash stats
Figure 2E'	Statistics for instantaneous strain rate (pp per min) for cells far from pit [cir]
	Tissue SRT compared to Cell Shape SRT				Tissue SRT compared to Intercalation SRT
		Time	pvalues			Time	pvalues
		-18	0.277245			-18	0.585417
		-13.5	0.341702			-13.5	0.0290282
		-9	0.683023			-9	0.195384
		-4.5	0.0182515			-4.5	0.0265794
		0	6.94734e-11			0	0.65928
		4.5	3.30892e-05			4.5	0.262611
		9	3.76656e-05			9	0.000236879
		13.5	0.000537969			13.5	0.00212355
		18	0.0126704			18	0.040065
