# Supplementary material for: Radially patterned cell behaviours during tube budding from an epithelium
Source: eLife. 2018 Jul 17;7:e35717. doi: 10.7554/eLife.35717 (PMC6089598; doi:10.7554/eLife.35717)
Supplement: Figure 3—figure supplement 1—source data 1. — Related to Figure 3—figure supplement 1D,E and F. [file elife-35717-fig3-figsupp1-data1.xlsx]

## Sheet: D
Suppl Figure 3D	Cumulative Tissue strain rate (pp per min) for all cells
	Tissue SRT [rad]			Tissue SRT [cir]
	Time	Apical	Basal	Time	Apical	Basal
	-16.5	1.0142	1	-16.5	0.985	1
	-13.5	1.0105	1.0039	-13.5	0.972	0.9972
	-10.5	1.014	1.0095	-10.5	0.9546	0.9893
	-7.5	1.0116	1.0111	-7.5	0.9442	0.989
	-4.5	1.014	1.011	-4.5	0.93	0.985
	-1.5	1.0197	1.018	-1.5	0.9151	0.9771
	1.5	1.0182	1.0248	1.5	0.9019	0.9749
	4.5	1.0192	1.0325	4.5	0.8863	0.9664
	7.5	1.028	1.0429	7.5	0.8735	0.9584
	10.5	1.0378	1.062	10.5	0.8508	0.9456
	13.5	1.0379	1.08	13.5	0.8366	0.9281
	16.5	1.0583	1.1062	16.5	0.8138	0.9065

## Sheet: D dash
Suppl Figure 3D'	Cumulative Cell shape strain rate (pp per min) for all cells
	Cell shape SRT [rad]			Cell shape SRT [cir]
	Time	Apical	Basal	Time	Apical	Basal
	-16.5	1.005	1	-16.5	0.9891	1
	-13.5	1.003	0.9991	-13.5	0.9783	0.9922
	-10.5	0.9988	0.9875	-10.5	0.9636	0.9877
	-7.5	0.9871	0.9779	-7.5	0.9579	0.993
	-4.5	0.9834	0.9779	-4.5	0.9481	0.9915
	-1.5	0.9781	0.9723	-1.5	0.942	0.9945
	1.5	0.9699	0.9678	1.5	0.9352	0.997
	4.5	0.961	0.9648	4.5	0.9276	0.9949
	7.5	0.9587	0.9654	7.5	0.9271	0.9952
	10.5	0.9599	0.9744	10.5	0.9119	0.992
	13.5	0.9554	0.9743	13.5	0.9057	0.9852
	16.5	0.9566	0.9768	16.5	0.8927	0.9791

## Sheet: D dash dash
Suppl Figure 3D''	Cumulative Intercalation strain rate (pp per min) for all cells
	Intercalation SRT [rad]			Intercalation SRT [cir]
	Time	Apical	Basal	Time	Apical	Basal
	-16.5	1.0043	1	-16.5	0.9957	1
	-13.5	1.0044	0.9998	-13.5	0.9956	1.0002
	-10.5	1.0084	1.0094	-10.5	0.9917	0.9907
	-7.5	1.0149	1.0181	-7.5	0.9853	0.9822
	-4.5	1.0188	1.0184	-4.5	0.9816	0.9819
	-1.5	1.0279	1.0304	-1.5	0.9729	0.9705
	1.5	1.0348	1.038	1.5	0.9663	0.9634
	4.5	1.0433	1.0461	4.5	0.9585	0.9559
	7.5	1.0547	1.0542	7.5	0.9481	0.9486
	10.5	1.0616	1.062	10.5	0.942	0.9416
	13.5	1.0678	1.074	13.5	0.9365	0.9311
	16.5	1.0825	1.0924	16.5	0.9238	0.9155

## Sheet: E
Figure 3E	Cumulative Tissue strain rate (pp per min) for cells near to pit
	Tissue SRT [rad]			Tissue SRT [cir]
	Time	Apical	Basal	Time	Apical	Basal
	-13.5	0.9872	0.9981	-13.5	0.9498	0.9996
	-9	0.9765	0.9938	-9	0.9296	0.9857
	-4.5	0.9661	0.9899	-4.5	0.8932	0.9748
	0	0.9408	0.9947	0	0.8651	0.9545
	4.5	0.9028	0.9917	4.5	0.8258	0.9446
	9	0.8712	0.9769	9	0.79	0.9123
	13.5	0.8427	0.9846	13.5	0.7502	0.8729
	18	0.8303	1.0223	18	0.7024	0.7881

## Sheet: E stats
Figure 3E	Statistics for instantaneous tissue strain rate (pp per min) for cells near to pit
	[rad] apical compared to [rad] basal				[cir] apical compared to [cir] basal
		Time	pvalues			Time	pvalues
		-13.5	0.0657394			-13.5	0.000151538
		-9	0.0183874			-9	0.00308595
		-4.5	0.291378			-4.5	1.73e-06
		0	2.27e-05			0	0.0077836
		4.5	0.000185204			4.5	1.26e-05
		9	0.413937			9	0.157791
		13.5	0.173862			13.5	0.901078
		18	0.834458			18	0.766317

## Sheet: F
Figure 3F	Cumulative Tissue strain rate (pp per min) for cells far from pit
	Tissue SRT [rad]			Tissue SRT [cir]
	Time	Apical	Basal	Time	Apical	Basal
	-13.5	1.0474	1.029	-13.5	0.9594	0.9856
	-9	1.0544	1.0305	-9	0.951	0.9808
	-4.5	1.0735	1.0409	-4.5	0.939	0.978
	0	1.0884	1.056	0	0.9222	0.9794
	4.5	1.1062	1.0708	4.5	0.9142	0.9709
	9	1.1319	1.1088	9	0.8924	0.9615
	13.5	1.131	1.1586	13.5	0.8741	0.9476
	18	1.165	1.2001	18	0.833	0.934

## Sheet: F stats
Figure 3F	Statistics for instantaneous tissue strain rate (pp per min) for cells far from pit
	[rad] apical compared to [rad] basal				[cir] apical compared to [cir] basal
		Time	pvalues			Time	pvalues
		-13.5	0.141551			-13.5	0.452017
		-9	0.754898			-9	0.218934
		-4.5	0.284408			-4.5	0.00135975
		0	0.894525			0	4.63e-05
		4.5	0.596387			4.5	0.783005
		9	0.271693			9	0.0113633
		13.5	6.53e-06			13.5	0.663127
		18	0.693728			18	0.0137017
