# Supplementary material for: Radially patterned cell behaviours during tube budding from an epithelium
Source: eLife. 2018 Jul 17;7:e35717. doi: 10.7554/eLife.35717 (PMC6089598; doi:10.7554/eLife.35717)
Supplement: Figure 3—figure supplement 2—source data 1. — Related to Figure 3—figure supplement 2A–D. [file elife-35717-fig3-figsupp2-data1.xlsx]

## Sheet: A
Figure Suppl 3A	Instantaneous strain rate (pp per min) for cells near to pit [rad]
		Tissue SRT				Cell shape SRT				Intercalation SRT
	Time	lower CI	Mean	upper CI	N	lower CI	Mean	upper CI	N	lower CI	Mean	upper CI	N
	-13.5	-0.00324456	-0.000416287	0.00241199	260	-0.00327992	-0.00112759	0.00102473	260	-0.00380257	-0.00126938	0.00126381	260
	-9	-0.00386746	-0.000959049	0.00194936	453	-0.00567354	-0.00358905	-0.00150456	453	0.000402471	0.00275199	0.0051015	453
	-4.5	-0.00302626	-0.000886297	0.00125367	726	-0.00357474	-0.00176158	5.16e-05	726	-0.00111687	0.000823122	0.00276311	726
	0	-0.00165759	0.00107378	0.00380516	569	-0.00493234	-0.0028004	-0.000668468	569	-3.87e-05	0.00222226	0.00448322	569
	4.5	-0.00324095	-0.000666619	0.00190771	546	-0.00411051	-0.00228808	-0.000465645	546	-0.00115478	0.000629714	0.0024142	546
	9	-0.00633726	-0.00332937	-0.000321478	506	-0.00532072	-0.00310123	-0.000881742	506	-0.000611674	0.00124495	0.00310157	506
	13.5	-0.0019461	0.00174488	0.00543586	360	-0.00743454	-0.00500611	-0.00257768	360	0.00291495	0.00540134	0.00788773	360
	18	0.00242229	0.00833792	0.0142536	89	-0.0116642	-0.008069	-0.00447381	89	0.00687653	0.0110622	0.0152479	89

## Sheet: A stats
Figure Suppl 3A	Statistics for instantaneous strain rate (pp per min) for cells near to pit [rad]
	Tissue SRT compared to Cell Shape SRT				Tissue SRT compared to Intercalation SRT
		Time	pvalues			Time	pvalues
		-13.5	0.853456			-13.5	0.799536
		-9	0.0586663			-9	0.213007
		-4.5	0.5627			-4.5	0.13896
		0	0.00289871			0	0.506151
		4.5	0.330219			4.5	0.165943
		9	0.791098			9	0.0028827
		13.5	0.000294955			13.5	0.0743184
		18	0.000320509			18	0.391035

## Sheet: A dash
Figure Suppl 3A'	Instantaneous strain rate (pp per min) for cells near to pit [cir]
		Tissue SRT				Cell shape SRT				Intercalation SRT
	Time	lower CI	Mean	upper CI	N	lower CI	Mean	upper CI	N	lower CI	Mean	upper CI	N
	-13.5	-0.00342998	-9.62e-05	0.00323754	260	-0.00564048	-0.00362826	-0.00161603	260	-0.00126381	0.00126938	0.00380257	260
	-9	-0.00583835	-0.00309468	-0.00035101	453	-0.00264443	-0.000346478	0.00195147	453	-0.0051015	-0.00275199	-0.000402473	453
	-4.5	-0.0047024	-0.00248474	-0.000267087	726	-0.00314304	-0.00146535	0.000212343	726	-0.00276311	-0.000823123	0.00111686	726
	0	-0.0074318	-0.00466701	-0.00190223	569	-0.00603156	-0.00372394	-0.00141633	569	-0.00448322	-0.00222226	3.87e-05	569
	4.5	-0.00478327	-0.00233419	0.000114881	546	-0.00425837	-0.00248892	-0.000719466	546	-0.0024142	-0.000629714	0.00115478	546
	9	-0.0104379	-0.00773002	-0.00502213	506	-0.0066671	-0.00452309	-0.00237909	506	-0.00310157	-0.00124495	0.000611674	506
	13.5	-0.0132247	-0.0098047	-0.00638468	360	-0.00682991	-0.00418279	-0.00153567	360	-0.00788773	-0.00540134	-0.00291495	360
	18	-0.0281949	-0.0226993	-0.0172037	89	-0.017662	-0.0129993	-0.00833658	89	-0.0152479	-0.0110622	-0.00687652	89

## Sheet: A dash stats
Figure Suppl 3A'	Statistics for instantaneous strain rate (pp per min) for cells near to pit [cir]
	Tissue SRT compared to Cell Shape SRT				Tissue SRT compared to Intercalation SRT
		Time	pvalues			Time	pvalues
		-13.5	0.13635			-13.5	0.544206
		-9	0.16158			-9	0.757754
		-4.5	0.417257			-4.5	0.214637
		0	0.216635			0	0.211825
		4.5	0.852894			4.5	0.318661
		9	0.00914104			9	3.15e-06
		13.5	0.0226875			13.5	8.33e-06
		18	0.0814468			18	0.00394656

## Sheet: B
Figure Suppl 3B	Instantaneous strain rate (pp per min) for cells far from pit [rad]
		Tissue SRT				Cell shape SRT				Intercalation SRT
	Time	lower CI	Mean	upper CI	N	lower CI	Mean	upper CI	N	lower CI	Mean	upper CI	N
	-13.5	0.0035721	0.00635867	0.00914524	382	0.000104986	0.00220123	0.00429747	382	-0.000480408	0.00169986	0.00388013	382
	-9	-0.00196211	0.000325596	0.0026133	762	-0.00857877	-0.00686419	-0.00514961	762	0.00436865	0.00614158	0.00791452	762
	-4.5	0.000464358	0.00223181	0.00399927	1309	-0.00083887	0.000519942	0.00187875	1309	-0.000420054	0.00088925	0.00219856	1309
	0	0.00117713	0.00318807	0.005199	1200	-0.00233738	-0.00085331	0.000630763	1200	0.00208949	0.00366111	0.00523272	1200
	4.5	0.00150156	0.00308755	0.00467353	1145	-0.00289492	-0.00168695	-0.000478967	1145	0.00215951	0.00343309	0.00470667	1145
	9	0.00606204	0.0077638	0.00946556	1133	0.00216815	0.00348936	0.00481057	1133	0.00167279	0.00301591	0.00435903	1133
	13.5	0.00768323	0.00975211	0.011821	770	0.00305863	0.00456326	0.0060679	770	0.00241811	0.00387437	0.00533062	770
	18	0.00494602	0.00782922	0.0107124	247	0.00117778	0.00312737	0.00507695	247	0.0022039	0.00426632	0.00632874	247

## Sheet: B stats
Figure Suppl 3B	Statistics for instantaneous strain rate (pp per min) for cells far from pit [rad]
	Tissue SRT compared to Cell Shape SRT				Tissue SRT compared to Intercalation SRT
		Time	pvalues			Time	pvalues
		-13.5	0.17245			-13.5	0.00924782
		-9	3.3e-07			-9	8.02e-05
		-4.5	0.0548158			-4.5	0.477194
		0	7.02e-06			0	0.448349
		4.5	1.62e-08			4.5	0.987803
		9	0.002059			9	6.15e-08
		13.5	5.41e-06			13.5	3.26e-06
		18	0.018745			18	0.0787727

## Sheet: B dash
Figure Suppl 3B'	Instantaneous strain rate (pp per min) for cells far from pit [cir]
		Tissue SRT				Cell shape SRT				Intercalation SRT
	Time	lower CI	Mean	upper CI	N	lower CI	Mean	upper CI	N	lower CI	Mean	upper CI	N
	-13.5	-0.00535413	-0.00322258	-0.00109102	382	-0.00483056	-0.00289944	-0.000968314	382	-0.00388013	-0.00169986	0.000480408	382
	-9	-0.00318005	-0.00107493	0.00103019	762	0.00230398	0.00413628	0.00596858	762	-0.00791452	-0.00614158	-0.00436865	762
	-4.5	-0.00224848	-0.000647184	0.00095411	1309	-0.00127263	-6.94e-05	0.00113375	1309	-0.00219855	-0.00088925	0.000420055	1309
	0	-0.00145714	0.000314854	0.00208685	1200	0.00254454	0.00396422	0.00538389	1200	-0.00523272	-0.00366111	-0.00208949	1200
	4.5	-0.00348336	-0.00193628	-0.000389198	1145	-0.000356604	0.000864491	0.00208559	1145	-0.00470667	-0.00343309	-0.00215951	1145
	9	-0.00381677	-0.0021538	-0.000490827	1133	-0.000524657	0.000830234	0.00218513	1133	-0.00435903	-0.00301591	-0.00167279	1133
	13.5	-0.00505934	-0.00323989	-0.00142044	770	-0.000169868	0.00119611	0.00256209	770	-0.00533062	-0.00387437	-0.00241812	770
	18	-0.00591503	-0.00320858	-0.000502127	247	-0.000228985	0.0019174	0.00406379	247	-0.00632874	-0.00426632	-0.0022039	247

## Sheet: B dash stats
Figure Suppl 3B'	Statistics for instantaneous strain rate (pp per min) for cells far from pit [cir]
	Tissue SRT compared to Cell Shape SRT				Tissue SRT compared to Intercalation SRT
		Time	pvalues			Time	pvalues
		-13.5	0.410438			-13.5	0.143177
		-9	0.00531847			-9	0.000297611
		-4.5	0.320813			-4.5	0.360096
		0	1.43e-05			0	1.41e-05
		4.5	0.000256709			4.5	0.121568
		9	0.0248339			9	0.850492
		13.5	1.38e-05			13.5	0.245463
		18	0.00975235			18	0.60766
