# Supplementary material for: Radially patterned cell behaviours during tube budding from an epithelium
Source: eLife. 2018 Jul 17;7:e35717. doi: 10.7554/eLife.35717 (PMC6089598; doi:10.7554/eLife.35717)
Supplement: Figure 3—source data 1. — Related to Figure 3D–E. [file elife-35717-fig3-data1.xlsx]

## Sheet: D 
Figure 3D	Cumulative Cell shape strain rate for cells near to pit
	Cell shape SRT [rad]			Cell shape SRT [cir]
	Time	Apical	Basal	Time	Apical	Basal
	-13.5	0.9844	0.9949	-13.5	0.942	0.9838
	-9	0.9664	0.979	-9	0.9251	0.9823
	-4.5	0.9438	0.9713	-4.5	0.9011	0.9758
	0	0.9199	0.9591	0	0.8733	0.9596
	4.5	0.8776	0.9493	4.5	0.8426	0.9489
	9	0.8469	0.9361	9	0.8162	0.9298
	13.5	0.8331	0.9153	13.5	0.7816	0.9125
	18	0.8023	0.8826	18	0.7351	0.8606

## Sheet: D stats
Figure 3D	Statistics for instantaneous cell shape strain rate (pp per min) for cells near to pit
	[rad] apical compared to [rad] basal				[cir] apical compared to [cir] basal
		Time	pvalues			Time	pvalues
		-13.5	0.221484			-13.5	0.00843447
		-9	0.00170724			-9	0.000216463
		-4.5	0.000690084			-4.5	1.53e-05
		0	0.000690274			0	0.00244454
		4.5	0.00261575			4.5	0.000317685
		9	0.0333417			9	0.167212
		13.5	0.0350347			13.5	0.539947
		18	0.414129			18	0.869973

## Sheet: D dash 
Figure 3D'	Cumulative Intercalation strain rate for cells near to pit
	Intercalation SRT [rad]			Intercalation SRT [cir]
	Time	Apical	Basal	Time	Apical	Basal
	-13.5	0.9945	0.9943	-13.5	1.0056	1.0057
	-9	0.999	1.0067	-9	1.001	0.9934
	-4.5	1.0103	1.0104	-4.5	0.9898	0.9897
	0	1.0104	1.0206	0	0.9897	0.9798
	4.5	1.0174	1.0235	4.5	0.9829	0.9771
	9	1.0246	1.0292	9	0.9759	0.9716
	13.5	1.018	1.0546	13.5	0.9823	0.9483
	18	1.0288	1.1084	18	0.9721	0.9022

## Sheet: D dash stats
Figure 3D'	Statistics for instantaneous intercalation strain rate (pp per min) for cells near to pit
	[rad] apical compared to [rad] basal				[cir] apical compared to [cir] basal
		Time	pvalues			Time	pvalues
		-13.5	0.717338			-13.5	0.717337
		-9	0.594174			-9	0.594173
		-4.5	0.0464676			-4.5	0.0464679
		0	0.368483			0	0.368483
		4.5	0.67035			4.5	0.67035
		9	0.386322			9	0.386322
		13.5	0.0270766			13.5	0.0270766
		18	0.853446			18	0.853449

## Sheet: E
Figure 3E	Cumulative Cell shape strain rate for cells far from pit
	Cell shape SRT [rad]			Cell shape SRT [cir]
	Time	Apical	Basal	Time	Apical	Basal
	-13.5	1.0151	1.01	-13.5	0.9854	0.987
	-9	1.0104	0.9792	-9	0.9744	1.0056
	-4.5	1.0161	0.9815	-4.5	0.9696	1.0053
	0	1.0139	0.9778	0	0.9689	1.0234
	4.5	1.0096	0.9704	4.5	0.9722	1.0274
	9	1.0143	0.9857	9	0.9627	1.0312
	13.5	1.0084	1.0062	13.5	0.9544	1.0368
	18	1.0137	1.0204	18	0.9264	1.0457

## Sheet: E stats
Figure 3E	Statistics for instantaneous cell shape strain rate (pp per min) for cells far from pit
	[rad] apical compared to [rad] basal				[cir] apical compared to [cir] basal
		Time	pvalues			Time	pvalues
		-13.5	0.137263			-13.5	0.799981
		-9	2.21e-07			-9	9.04e-08
		-4.5	0.890975			-4.5	0.00169885
		0	0.940542			0	0.000444343
		4.5	0.52937			4.5	0.815091
		9	0.00903244			9	0.0785611
		13.5	0.000682073			13.5	0.168026
		18	0.555884			18	0.00409352

## Sheet: E dash
Figure 3E'	Cumulative Intercalation strain rate for cells far from pit
	Intercalation SRT [rad]			Intercalation SRT [cir]
	Time	Apical	Basal	Time	Apical	Basal
	-13.5	1.0237	1.0077	-13.5	0.9769	0.9924
	-9	1.0277	1.0359	-9	0.973	0.9653
	-4.5	1.0354	1.0401	-4.5	0.9658	0.9615
	0	1.051	1.0573	0	0.9515	0.9458
	4.5	1.0669	1.0738	4.5	0.9373	0.9313
	9	1.0809	1.0885	9	0.9252	0.9187
	13.5	1.0889	1.1076	13.5	0.9183	0.9028
	18	1.1089	1.1291	18	0.9018	0.8857

## Sheet: E dash stats
Figure 3E'	Statistics for instantaneous intercalation strain rate (pp per min) for cells far from pit
	[rad] apical compared to [rad] basal				[cir] apical compared to [cir] basal
		Time	pvalues			Time	pvalues
		-13.5	0.543492			-13.5	0.543491
		-9	5.17e-07			-9	5.17e-07
		-4.5	0.578339			-4.5	0.578336
		0	0.665104			0	0.665104
		4.5	0.98211			4.5	0.982109
		9	0.342133			9	0.342133
		13.5	0.148082			13.5	0.148082
		18	0.899578			18	0.89958
