# Supplementary material for: Radially patterned cell behaviours during tube budding from an epithelium
Source: eLife. 2018 Jul 17;7:e35717. doi: 10.7554/eLife.35717 (PMC6089598; doi:10.7554/eLife.35717)
Supplement: Figure 4—figure supplement 1—source data 1. — Related to Figure 4—figure supplement 1E. [file elife-35717-fig4-figsupp1-data1.xlsx]

## Sheet: E
Figure 4C	Total strain rate in Z (pp /um)
		Total strain rate for cells near to the pit [rad]				Total strain rate for cells near to the pit [cir]
	Time	lower CI	Mean	upper CI	N	lower CI	Mean	upper CI	N
	-18	0.00226071	0.00437267	0.00648462	36	-0.000572223	0.00178336	0.00413895	36
	-13.5	-0.000519898	0.00120703	0.00293396	307	-0.00872806	-0.00730125	-0.00587444	307
	-9	-0.00464569	-0.0026593	-0.000672913	420	-0.0136884	-0.0120422	-0.010396	420
	-4.5	-0.00626187	-0.00435102	-0.00244018	479	-0.0163512	-0.0148279	-0.0133046	479
	0	-0.0102774	-0.00761451	-0.00495167	336	-0.0190961	-0.0170711	-0.0150461	336
	4.5	-0.0155368	-0.0132242	-0.0109117	410	-0.0249824	-0.0233769	-0.0217714	410
	9	-0.015992	-0.0134758	-0.0109597	260	-0.0304199	-0.0283453	-0.0262707	260
	13.5	-0.0164908	-0.0129368	-0.00938281	148	-0.0322003	-0.0294895	-0.0267787	148
	18	-0.0133784	-0.00867247	-0.00396652	58	-0.0296876	-0.0247571	-0.0198267	58
		Total strain rate for cells far from the pit [rad]				Total strain rate for cells far from the pit [cir]
	Time	lower CI	Mean	upper CI	N	lower CI	Mean	upper CI	N
	-18	0.0149698	0.0182125	0.0214551	37	0.00455025	0.00704819	0.00954613	37
	-13.5	0.00301785	0.00497441	0.00693096	350	-0.00211478	-0.000578418	0.000957946	350
	-9	0.00182751	0.00387649	0.00592547	515	-0.00397561	-0.00209569	-0.00021577	515
	-4.5	-0.000533743	0.00162663	0.003787	652	-0.00729996	-0.00553914	-0.00377832	652
	0	-0.00167863	0.000821508	0.00332165	479	-0.00846163	-0.00659418	-0.00472674	479
	4.5	-0.000407236	0.00189096	0.00418916	564	-0.0120727	-0.0103134	-0.00855413	564
	9	0.000921567	0.00329846	0.00567536	394	-0.0153423	-0.0135882	-0.0118342	394
	13.5	0.00395351	0.0066514	0.0093493	243	-0.0207468	-0.0191861	-0.0176254	243
	18	-0.002108	0.00166442	0.00543685	131	-0.0257454	-0.0232406	-0.0207358	131

## Sheet: E stats
Figure 4E	Statistics for total strain rate in Z (pp /um)
	[rad] near to pit compared to [rad] far from pit				[cir] near to pit compared to [cir] far from pit
		Time	pvalues			Time	pvalues
		-18	0.000684878			-18	0.12963
		-13.5	0.0617464			-13.5	1.91e-06
		-9	0.00241658			-9	7.2e-17
		-4.5	1.93e-13			-4.5	7.68e-23
		0	2.94e-15			0	1.14e-27
		4.5	1.37e-37			4.5	3.42e-30
		9	2.07e-25			9	7.03e-28
		13.5	2.44e-13			13.5	2.03e-10
		18	0.0108076			18	0.372612
