# Supplementary material for: Radially patterned cell behaviours during tube budding from an epithelium
Source: eLife. 2018 Jul 17;7:e35717. doi: 10.7554/eLife.35717 (PMC6089598; doi:10.7554/eLife.35717)
Supplement: Figure 4—source data 1. — Related to Figure 4B’, C’ and D’. [file elife-35717-fig4-data1.xlsx]

## Sheet: B dash
Figure 4B'	Wedging rate (pp /z um)
		Wedging rate for cells near to the pit [rad]				Wedging rate for cells near to the pit [cir]
	Time	lower CI	Mean	upper CI	N	lower CI	Mean	upper CI	N
	-18	0.0017091	0.00315694	0.00460479	36	-0.00244582	-0.000331778	0.00178226	36
	-13.5	-0.0037689	-0.00243462	-0.00110033	307	-0.0071512	-0.00593503	-0.00471885	307
	-9	-0.0075284	-0.00578313	-0.00403787	420	-0.012624	-0.0112857	-0.00994744	420
	-4.5	-0.0101022	-0.00853606	-0.00696996	479	-0.0159997	-0.0146876	-0.0133755	479
	0	-0.0135732	-0.0114293	-0.00928547	336	-0.0210031	-0.0191666	-0.0173301	336
	4.5	-0.0195974	-0.0176648	-0.0157322	410	-0.0241669	-0.0226891	-0.0212112	410
	9	-0.0228161	-0.0203405	-0.017865	260	-0.028682	-0.0267219	-0.0247617	260
	13.5	-0.0204655	-0.0171008	-0.0137361	148	-0.0325677	-0.0299595	-0.0273513	148
	18	-0.0135493	-0.00931583	-0.00508239	58	-0.0293784	-0.0252135	-0.0210486	58
		Wedging rate for cells far from the pit [rad]				Wedging rate for cells far from the pit [cir]
	Time	lower CI	Mean	upper CI	N	lower CI	Mean	upper CI	N
	-18	0.00568043	0.00797478	0.0102691	37	0.00669689	0.00877989	0.0108629	37
	-13.5	-0.000118171	0.00139305	0.00290428	350	5.14e-07	0.00147882	0.00295713	350
	-9	-0.000828261	0.000977838	0.00278394	515	-0.00284121	-0.00118551	0.000470193	515
	-4.5	-0.00142091	0.000392786	0.00220648	652	-0.00694621	-0.00543088	-0.00391556	652
	0	-0.00201485	-3.87983e-05	0.00193726	479	-0.00551362	-0.00383437	-0.00215513	479
	4.5	-0.000782234	0.00114201	0.00306625	564	-0.00668037	-0.00499354	-0.00330672	564
	9	-0.00310467	-0.00111563	0.000873404	394	-0.0120596	-0.0102971	-0.00853458	394
	13.5	-0.0037443	-0.00156015	0.000624013	243	-0.0156808	-0.0137496	-0.0118185	243
	18	-0.00633491	-0.00344228	-0.000549651	131	-0.0214501	-0.01868	-0.01591	131

## Sheet: B dash stats
Figure 4B'	Statistics for Wedging rate (pp /z um)
	[rad] near to pit compared to [rad] far from pit				[cir] near to pit compared to [cir] far from pit
		Time	pvalues			Time	pvalues
		-18	0.0807867			-18	0.00303129
		-13.5	0.0708947			-13.5	1.3e-10
		-9	1.47e-06			-9	1.26e-18
		-4.5	3.14e-25			-4.5	2.84e-30
		0	2.42e-37			0	3.75e-42
		4.5	8.53e-51			4.5	3.46e-49
		9	2.12e-35			9	1.88e-39
		13.5	3.02e-11			13.5	1.34e-18
		18	0.143798			18	0.0143571

## Sheet: C dash
Figure 4C'	Interleaving rate (pp /z um)
		Interleaving rate for cells near to the pit [rad]				Interleaving rate for cells near to the pit [cir]
	Time	lower CI	Mean	upper CI	N	lower CI	Mean	upper CI	N
	-18	-0.0002195	0.00121564	0.00265078	36	0.000397627	0.00211506	0.00383248	36
	-13.5	0.0022354	0.00364168	0.00504797	307	-0.00261519	-0.00136618	-0.000117169	307
	-9	0.00173313	0.0031238	0.00451446	420	-0.00211267	-0.000756493	0.000599688	420
	-4.5	0.00290346	0.00418504	0.00546662	479	-0.00135376	-0.000140303	0.00107315	479
	0	0.00202372	0.00381487	0.00560602	336	0.000381953	0.00209551	0.00380906	336
	4.5	0.00308912	0.00444058	0.00579203	410	-0.00190584	-0.000687805	0.000530228	410
	9	0.00504853	0.00686471	0.0086809	260	-0.00337281	-0.00162343	0.000125954	260
	13.5	0.00173757	0.00416403	0.00659048	148	-0.00145855	0.000470058	0.00239867	148
	18	-0.00352052	0.000643323	0.00480716	58	-0.00287884	0.000456365	0.00379157	58
		Interleaving rate for cells far from the pit [rad]				Interleaving rate for cells far from the pit [cir]
	Time	lower CI	Mean	upper CI	N	lower CI	Mean	upper CI	N
	-18	0.00704296	0.0102378	0.0134325	37	-0.00332854	-0.00173178	-0.000135023	37
	-13.5	0.0018165	0.00358141	0.00534632	350	-0.00351	-0.00205721	-0.000604422	350
	-9	0.00135594	0.00289864	0.00444133	515	-0.00230326	-0.0009102	0.000482858	515
	-4.5	-0.00020985	0.00123387	0.00267759	652	-0.00134907	-0.000108257	0.00113256	652
	0	-0.000942813	0.000860297	0.00266341	479	-0.00423506	-0.0027598	-0.00128454	479
	4.5	-0.000788216	0.000748971	0.00228616	564	-0.00669284	-0.00531983	-0.00394682	564
	9	0.00283196	0.00441411	0.00599627	394	-0.00473606	-0.00329119	-0.00184632	394
	13.5	0.00617374	0.00821156	0.0102494	243	-0.00719795	-0.00543647	-0.00367498	243
	18	0.00261583	0.00510672	0.0075976	131	-0.00704551	-0.00456055	-0.00207558	131

## Sheet: C dash stats
Figure 4C'	Statistics for Interleaving rate (pp /z um)
	[rad] near to pit compared to [cir] near to pit				[rad] far from pit compared to [cir] far from pit
		Time	pvalues			Time	pvalues
		-18	0.689048			-18	0.0014899
		-13.5	1.50192e-06			-13.5	1.95e-05
		-9	3.12501e-08			-9	0.168059
		-4.5	0.034807			-4.5	0.838167
		0	0.0800241			0	0.909108
		4.5	0.000673546			4.5	2.75e-13
		9	1.34746e-06			9	3.03e-17
		13.5	0.034532			13.5	5.14e-19
		18	0.950777			18	2.27e-09

## Sheet: D dash
Figure 4D'	Rate of tilt (xy um /z um)
		Rate of tilt cells near to the pit [rad]				Rate of tilt cells near to the pit [cir]
	Time	lower CI	Mean	upper CI	N	lower CI	Mean	upper CI	N
	-18	-0.027184	-0.0151624	-0.00314068	36	-0.00242792	0.0145167	0.0314613	36
	-13.5	-0.102113	-0.0915277	-0.0809423	307	-0.0157219	-0.00591212	0.00389763	307
	-9	-0.162019	-0.150722	-0.139425	420	-0.00507989	0.00594429	0.0169685	420
	-4.5	-0.173695	-0.16083	-0.147965	479	-0.0211455	-0.0106514	-0.000157181	479
	0	-0.198119	-0.17989	-0.161661	336	-0.0303768	-0.018043	-0.00570914	336
	4.5	-0.197112	-0.1814	-0.165687	410	-0.0368364	-0.0256415	-0.0144467	410
	9	-0.199839	-0.179225	-0.158611	260	-0.036814	-0.0239094	-0.0110048	260
	13.5	-0.255319	-0.229622	-0.203926	148	-0.0207841	-0.00416379	0.0124565	148
	18	-0.20118	-0.162754	-0.124329	58	-0.015123	0.0143337	0.0437903	58
		Rate of tilt cells far from the pit [rad]				Rate of tilt cells far from the pit [cir]
	Time	lower CI	Mean	upper CI	N	lower CI	Mean	upper CI	N
	-18	-0.112519	-0.090271	-0.0680234	37	-0.0187722	-0.00041473	0.0179427	37
	-13.5	-0.160922	-0.149663	-0.138404	350	0.0447723	0.0575275	0.0702827	350
	-9	-0.199975	-0.187221	-0.174466	515	0.0298395	0.0457116	0.0615838	515
	-4.5	-0.238235	-0.226377	-0.214519	652	0.00188691	0.0158609	0.0298349	652
	0	-0.2798	-0.266045	-0.252291	479	-0.0293847	-0.0158674	-0.00235003	479
	4.5	-0.297872	-0.284635	-0.271398	564	-0.0534124	-0.039796	-0.0261797	564
	9	-0.315145	-0.299416	-0.283687	394	-0.0755636	-0.0626768	-0.0497899	394
	13.5	-0.380859	-0.361642	-0.342425	243	-0.0810194	-0.067848	-0.0546767	243
	18	-0.388473	-0.360607	-0.332741	131	-0.0907294	-0.0662697	-0.04181	131

## Sheet: D dash stats
Figure 4D'	Statistics for rate of tilt (xy um /z um)
	[rad] near to pit compared to [rad] far from pit				[cir] near to pit compared to [cir] far from pit
		Time	pvalues			Time	pvalues
		-18	0.00439819			-18	0.551964
		-13.5	3.7e-08			-13.5	5.54e-10
		-9	3.39e-09			-9	9.15e-07
		-4.5	1.11e-13			-4.5	0.00658668
		0	1.49e-13			0	0.200236
		4.5	4.86e-12			4.5	0.131678
		9	3.14e-18			9	1.3e-07
		13.5	9.63e-12			13.5	4.11e-08
		18	9.27e-11			18	4.15e-05
