# Supplementary material for: Radially patterned cell behaviours during tube budding from an epithelium
Source: eLife. 2018 Jul 17;7:e35717. doi: 10.7554/eLife.35717 (PMC6089598; doi:10.7554/eLife.35717)
Supplement: Figure 5—source data 1. — Related to Figure 5C. [file elife-35717-fig5-data1.xlsx]

## Sheet: C
Figure 5C	Cumulative neighbour gains
	Time	circumferential gains	radial gains
	-16.5	3	0
	-13.5	15	6
	-10.5	36	16
	-7.5	64	25
	-4.5	89	42
	-1.5	115	57
	1.5	155	77
	4.5	180	89
	7.5	199	103
	10.5	233	117
	13.5	243	125
	16.5	256	130

## Sheet: D
Figure 5D	Cumulative proportion (pp) of circumferential productive neighbour gains
	Time	Cumulative pp of productive neigh gains
	-16.5	0.0122449
	-13.5	0.0187951
	-10.5	0.026591
	-7.5	0.0369877
	-4.5	0.040952
	-1.5	0.0460037
	1.5	0.0535169
	4.5	0.0617239
	7.5	0.0647469
	10.5	0.0800961
	13.5	0.0826734
	16.5	0.0930833
