# Supplementary material for: Radially patterned cell behaviours during tube budding from an epithelium
Source: eLife. 2018 Jul 17;7:e35717. doi: 10.7554/eLife.35717 (PMC6089598; doi:10.7554/eLife.35717)
Supplement: Figure 6—figure supplement 1—source data 1. — Related to Figure 6—figure supplement 1. [file elife-35717-fig6-figsupp1-data1.xlsx]

## Sheet: A
Figure Suppl 6A	Interface length (microns)
	Time	lower CI	Mean	upper CI	N
	-9	1.42355	1.65186	1.88017	113
	-7	1.25822	1.40294	1.54766	177
	-5	1.24002	1.37406	1.5081	172
	-3	0.979876	1.08058	1.18128	215
	-1	0.658698	0.712209	0.765721	330

## Sheet: B
Figure Suppl 6B	Interface length deviation from Voronoi (microns)
	Circumferential baseline
	Time	lower CI	Mean	upper CI	N
	-18	-0.511065	-0.47007	-0.429076	3973
	-13.5	-0.504926	-0.469985	-0.435044	5506
	-9	-0.500158	-0.469454	-0.43875	7106
	-4.5	-0.499354	-0.470862	-0.442369	8155
	0	-0.495779	-0.468425	-0.441072	8683
	4.5	-0.497934	-0.469548	-0.441161	7997
	9	-0.484666	-0.453732	-0.422799	6709
	13.5	-0.481188	-0.445719	-0.410251	5068
	18	-0.481204	-0.442492	-0.40378	3535
	Radial baseline
	Time	lower CI	Mean	upper CI	N
	-18	-0.583144	-0.54601	-0.508875	4619
	-13.5	-0.584472	-0.553149	-0.521825	6452
	-9	-0.575349	-0.547862	-0.520376	8249
	-4.5	-0.568006	-0.542518	-0.51703	9544
	0	-0.568742	-0.544098	-0.519454	10145
	4.5	-0.569188	-0.543679	-0.518169	9366
	9	-0.570911	-0.543241	-0.51557	7891
	13.5	-0.572469	-0.540821	-0.509173	5943
	18	-0.557077	-0.52225	-0.487423	4110

## Sheet: C
Figure Suppl 6C	Vertex Angle deviation from Voronoi (deg.)
	Circumferential baseline
	Time	lower CI	Mean	upper CI	N
	-18	-5.97994	-5.24206	-4.50418	4459
	-13.5	-5.77414	-5.13917	-4.50419	6155
	-9	-5.71729	-5.15592	-4.59456	7906
	-4.5	-5.63985	-5.11608	-4.59231	9103
	0	-5.59381	-5.09118	-4.58854	9710
	4.5	-5.77762	-5.2551	-4.73258	8928
	9	-6.11845	-5.54801	-4.97757	7510
	13.5	-6.08509	-5.42848	-4.77188	5658
	18	-5.67101	-4.95508	-4.23915	3962
	Radial baseline
	Time	lower CI	Mean	upper CI	N
	-18	2.87203	3.54725	4.22248	5327
	-13.5	2.85921	3.43049	4.00177	7361
	-9	2.97895	3.48207	3.98519	9369
	-4.5	3.00972	3.47684	3.94396	10843
	0	3.08426	3.53341	3.98255	11548
	4.5	3.13598	3.60002	4.06406	10623
	9	3.16168	3.66052	4.15936	8942
	13.5	2.96424	3.53885	4.11346	6710
	18	2.64554	3.27534	3.90515	4676

## Sheet: D
Figure Suppl 6D	Cell elongation
	Circumferential baseline
	Time	lower CI	Mean	upper CI	N
	-18	0.0338952	0.0446663	0.0554373	3973
	-13.5	0.0356001	0.044784	0.0539679	5506
	-9	0.0330899	0.0410783	0.0490666	7106
	-4.5	0.0302752	0.0376482	0.0450211	8155
	0	0.0287913	0.0358802	0.0429691	8683
	4.5	0.030707	0.0380276	0.0453483	7997
	9	0.0302585	0.0381483	0.0460382	6709
	13.5	0.0303149	0.0392957	0.0482766	5068
	18	0.016505	0.0261286	0.0357522	3535
	Radial baseline
	Time	lower CI	Mean	upper CI	N
	-18	-0.0475296	-0.0375579	-0.0275863	4619
	-13.5	-0.0475676	-0.0392348	-0.030902	6452
	-9	-0.0459766	-0.0386853	-0.031394	8249
	-4.5	-0.0447693	-0.0379915	-0.0312137	9544
	0	-0.0432847	-0.0367635	-0.0302424	10145
	4.5	-0.0440431	-0.0373403	-0.0306376	9366
	9	-0.044059	-0.0368599	-0.0296608	7891
	13.5	-0.0461051	-0.0378599	-0.0296146	5943
	18	-0.046322	-0.0372259	-0.0281298	4110
