# Supplementary material for: Radially patterned cell behaviours during tube budding from an epithelium
Source: eLife. 2018 Jul 17;7:e35717. doi: 10.7554/eLife.35717 (PMC6089598; doi:10.7554/eLife.35717)
Supplement: Figure 6—source data 1. — Related to Figure 6F–H. [file elife-35717-fig6-data1.xlsx]

## Sheet: F
Figure 6F	Prediction 1: Junction length
	circum. T1	circum. baseline	radial T1	radial baseline
	0.894388	-0.470935	0.338537	-1.27227
	-0.254197	1.6707	0.537628	-0.615033
	0.48393	0.486977	1.42747	0.239946
	0.274533	0.300704	0.344701	0.084548
	-0.307105	0.050822	1.02081	-0.311109
	-1.00017	-0.107069	0.826193	0.958662
	-0.574666	0.145699	-1.3417	1.16966
	0.697033	-0.558307	0.156757	0.483901
	0.184	0.111849	-1.79018	-1.98925
	0.504524	-0.258146	0.929992	-0.222473
	0.069479	0.03837	1.17859	1.04007
	0.171042	0.105222	2.55334	1.34033
	-1.14592	1.91222	0.976962	1.1467
	-0.268255	0.638066	0.095473	1.01937
	1.97043	-0.342178	-0.302045	1.0563
	-0.050343	-0.879687	-0.739886	-0.692432
	-0.202031	0.783662	1.51244	1.4866
	-0.713252	0.950025	-0.774299	0.593571
	-0.308934	-0.008494	-0.31202	0.45857
	2.10305	-0.840453	1.01112	0.574672
	0.016116	-0.450346	-0.993568	1.85434
	4.03704	-0.136749	0.982844	0.415852
	0.488487	0.5288	1.17406	-0.391343
	-1.09314	0.603241	-1.43744	0.883037
	-0.950816	1.16092	0.302845	0.276814
	-0.074878	1.21324	-1.45997	1.30733
	-2.08529	0.940503	-0.127134	0.564987
	0.106567	-0.767602	2.18407	0.757672
	-1.35941	-0.387131	0.008473	0.494485
	1.67742	0.758124	-0.633191	0.056017
	-0.733428	0.120491	2.60218	1.04037
	-1.72954	-0.087145	1.10652	0.165792
	-0.835233	2.77828	1.05109	0.299535
	-0.311367	-0.358112	-0.418889	-0.047784
	-1.26755	0.453649	0.765016	0.421566
	-1.09773	-0.094982	-0.311727	1.49438
	-1.31597	0.168866	0.2866	2.31924
	-2.79567	0.620973	0.402078	1.48224
	-0.145199	0.822429	0.380369	0.8758
	0.668164	-0.645139	-0.405627	0.974135
	-0.129335	0.374428	1.08863	-0.255163
	1.38541	0.550407	0.551394	0.862298
	1.41103	0.841029	-0.268619	-0.155692
	-0.440753	0.665429	-0.960587	0.042634
	0.868439	0.874696	-0.755473	0.184015
	0.968705	1.18372	-1.04099	0.363422
	0.517581	-0.858481	1.26172	-0.981937
	-1.37176	-0.142184	0.493338	0.406444
	0.200056	1.30522	-0.508533	0.36284
	-1.39147	0.716594	0.252164	0.087839
	-1.62602	-0.037393	0.191895	0.567473
	-0.99485	-1.05216	-0.561325	0.561174
	0.478229	0.4997	-1.31284	0.278792
	0.008642	0.256678	-1.18088	0.841617
	0.142868	-0.751193	1.13248	0.248974
	-0.061651	1.20896	-0.462509	0.746652
	-0.089897	3.70094	-0.838411	1.46287
	-0.076104	-0.059204	-0.232138	0.801522
	-1.0491	-2.28829	0.017245	0.249041
	-0.20675	-0.20172	-1.33685	2.06172
	-0.680569	0.004393	1.02416	0.379567
	1.47401	1.93918	1.01498	1.35039
	1.85867	2.28111	-0.690677	-0.277884
	1.71008	0.631143	-0.151336	-0.137307
	1.95565	1.97772	-0.622008	0.199549
	-0.820449	0.615254	-0.021854	0.50795
	-1.06516	1.82116	-0.631607	-0.993234
	0.572458	1.68208	-0.054996	1.78944
	-0.72785	1.08468	-0.807448	2.15972
	-0.826998	-0.414819	-0.03722	0.31948
	-0.998819	-0.793164	1.2738	0.237786
	-0.290147	1.71593	0.132873	-0.046947
	-0.403477	2.80545	0.519239	1.44643
	-0.009563	-0.295176	-0.650138	0.136003
	-8.9e-05	0.544314	2.83048	0.031008
	-0.569085	0.279526	0.037405	0.473916
	-0.788573	0.697701	-0.95029	0.082837
	0.292123	0.647465	2.9567	0.342968
	-0.594716	0.742372		2.28889
	0.163908	1.16833		-0.485101
	0.192405	-0.017171		0.487345
	0.865448	1.71921		-0.39152
	1.56681	0.617518		1.63447
	0.368636	0.493222		0.199883
	0.545641	0.349719		0.869319
	1.19145	0.189071		0.207026
	-0.253828	0.956024		0.55491
	-2.12913	1.36341		1.07886
	1.71971	-0.564711		0.41387
	0.458108	-0.087061		2.03462
	0.879887	3.71521		-2.02876
	0.314567	0.994286		2.10349
	-0.435745	1.18233		4.33688
	-0.46508	1.44068		0.884343
	-0.888728	1.3736		2.51934
	-1.46747	1.78614		-0.329504
	-1.01804	0.128326		0.027691
	-1.31924	-0.272022		0.6683
	-0.832217	1.91703		0.807396
	-1.19619	0.494523		-0.141695
	-0.051561	-1.65088		-0.375669
	0.919209	2.51507		2.02204
	0.813231	-0.093452		0.986849
	0.856898	-0.701869		0.426399
	0.047534	0.766783		1.07195
	0.821122	-1.46593		-0.191402
	1.35311	0.037599		1.4527
	-0.083204	0.178156		1.47188
	0.149588	0.514861		2.69597
	-0.383843	1.19564		-0.39657
	0.649964	1.48071		0.833008
	-0.008078	1.01174		1.07072
	-1.85365	1.03352		-0.672288
	-0.547879	-0.390778		-0.105873
	-1.28665	0.89927		1.65793
	-0.355845	-1.65654		1.35799
	0.756677	-0.374214		2.70803
	0.039895	2.60325		0.895079
	1.2725	1.97788		-0.206964
	-0.126323	0.569726		0.587837
	-0.52125	-0.653067		0.255096
	-1.75127	-0.996232		0.262936
	-0.11551	0.755257		0.378811
	-0.620013	1.66295		0.90855
	-1.44695	1.49538		-0.00958
	-0.322616	-0.497444		0.911602
	-0.232617	-0.268701		-0.481184
	-0.433737	0.389768		-0.615626
	0.848079	0.866664		0.240523
	0.485333	-1.65498		0.756392
	-0.2332	0.703938		0.181953
	-1.89485	1.48547		0.11497
	0.563487	1.25349		-0.244281
	0.290489	0.486049		0.438753
	-0.446503	0.933793		-0.59667
		0.88478		0.45851
		-0.020276		-0.291374
		0.108488		-0.243866
		1.40228		1.22158
		-1.33238		1.02794
		-1.26123		0.450032
		0.083425		1.42757
		0.218235		1.25632
		0.841344		-0.182589
		0.156295		0.925779
		2.76239		1.39836
		1.76885		1.86824
		1.60147		1.46545
		0.133142		-1.48531
		0.365245		-0.732855
		1.40281		-0.076999
		-0.015342		0.204416
		-2.40452		0.813954
		-1.68319		1.34208
		1.88414		0.672241
		0.779154		-1.4429
		1.33653		1.38342
		0.734985		1.41853
		1.60632		1.00875
		0.808144		-0.14242
		0.83709		-0.15803
		-0.002998		0.780822
		0.906754		0.136146
		0.099105		3.32863
		0.853035		0.215203
		0.821063		1.06448
		-0.259923		-0.457151
		1.09839		0.153802
		0.879932		2.0363
		1.53653		4.04784
		-0.074726		3.03191
		-0.394821		0.701648
		1.05926		-0.472396
		1.12168		0.740019
		0.037188		0.585292
		3.11746		0.341434
		1.29583		2.51922
		0.604393		-1.29336
		0.430424		0.215818
		1.16164		0.296064
		0.185984		0.243344
		0.575004		1.29064
		0.052528		1.01709
		1.18267		1.0986
		0.84859		0.395208
		-0.66015		1.07134
		0.093642		0.666983
		-0.450455		5.15025
		-1.00689		0.007403
		-0.303801		0.423642
		-0.801344		-0.313259
		-0.508239		0.173249
		0.062189		1.52816
		-0.135089		-0.110194
		1.60465		0.692963
		0.009614		-0.622316
		-0.285722		1.18052
		1.28779		1.55424
		0.064947		2.85342
		0.044516		0.13175
		-1.87152		-1.36249
		1.05091		1.17176
		0.007591		-0.071148
		1.05768		-0.633747
		0.453015		0.005849
		-0.013894		0.102782
		0.60995		0.636553
		0.447043		0.140025
		0.433558		0.88869
		0.73441		1.74411
		0.87301		0.124596
		-0.780756		-0.771944
		0.591402		0.674999
		0.234693		0.309885
		-0.795703		1.56709
		0.731519		1.00392
		1.31879		-0.237902
		-1.34305		0.248948
		0.784473		1.65072
		0.666154		-0.303936
		-0.080101		-1.60205
		1.64464		0.525078
		-0.728177		-0.05923
		1.76041		0.701937
		0.424013		0.019744
		0.526055		-0.277648
		-0.312806		0.628075
		2.43457		0.203963
		0.908879		1.36948
		0.040827		1.45469
		-0.768538		1.2284
		0.137485		0.225548
		0.606462		1.6157
		0.44262		-0.298867
		1.0312		-0.124335
		-1.30664		0.878813
		0.623385		1.64514
		2.80255		1.25712
		0.197885		1.33719
		0.097947		1.50983
		0.061029		3.24987
		-0.303343		1.20688
		-0.22684		0.648457
		-1.01784		-0.332378
		1.54317		-0.743749
		1.58852		3.91121
		-0.359994		-0.083224
		-0.716311		-1.63057
		0.237884		-0.381651
		0.641152		-0.048967
		-0.013876		1.04837
		-0.676807		3.17747
		1.13872		-0.163052
		1.00744		-0.040877
		1.23258		-0.421153
		0.881023		2.2664
		0.07091		0.760166
		1.43625		-0.254768
		2.3414		0.675897
		0.207779		0.451438
		2.206		1.97612
		2.24267		-0.1888
		-2.03237		0.120955
		-2.40756		0.566788
		1.104		0.202741
		0.976494		-0.588203
		2.29267		0.369442
		2.62789		0.487294
		-0.080103		1.27507
		0.675876		0.967254
		0.085382		0.855004
		-1.26405		0.266062
		1.26507		-0.916779
		-0.605997		0.510432
		-0.696478		0.47222
		-0.089557		0.478366
		-1.05571		0.985073
		0.673357		0.737517
		-1.35988		0.212115
		-0.387134		0.469513
		2.57993		0.646268
		-1.77808		0.19622
		2.03871		1.37418
		0.818614		0.955812
		-0.28768		0.116042
		1.00205		1.31183
		2.11844		0.532786
		0.045921		0.419707
		-1.334		-0.626916
		-1.13854		0.531965
		0.464468		0.859501
		1.00191		1.2732
		1.0477		0.335663
		2.0603		-0.691216
		-0.843462		-0.168774
		0.218609		0.867362
		1.35582		-0.346995
		1.16691		0.662178
		-0.787295		-0.661897
		0.391548		0.567139
		0.980547		-0.303264
		-0.406787		-0.014169
		0.272174		1.83048
		-1.01126		1.93531
		-0.593329		1.22623
		1.54957		-1.01674
		-0.470021		-1.33669
		-0.010197		-0.447304
		1.47667		0.228395
		0.617428		1.68615
		-0.620364		0.67734
		1.22036		2.1254
		0.592259		-0.035078
		1.64245		-0.39331
		-0.247895		3.19439
		0.541254		0.911366
		-0.010063		0.206872
		1.02254		1.29269
		1.77517		-0.044416
		-0.025189		0.807856
		-0.579788		1.26819
		0.878699		-0.258934
		0.947985		1.01605
		0.720097		1.00178
		-0.382989		0.309409
		1.19283		-0.086063
		-0.454278		3.14796
		0.092487		0.70817
		1.3091		0.264405
		1.54057		0.968147
		2.51736		0.228802
		-1.77367		1.48993
		-0.713193		0.113616
		0.52605		2.01319
		0.962667		0.591118
		-1.00858		-0.106158
		1.86373		1.44827
		0.80014		-1.01359
		-0.522439		2.31346
		-0.826785		0.791455
		0.099123		1.32561
		0.336737		1.09298
		-0.985529		0.688342
		-0.286742		0.286704
		1.12603		1.44655
		-0.0561		0.803665
		-1.07728		-1.43435
		0.668637		-0.440409
		-0.892755		0.778149
		-1.16176		1.15748
		0.534008		1.97939
		0.600226		1.63385
		-0.417101		0.684625
		1.16989		1.39739
		0.648293		1.27236
		-0.157671		1.01793
		-0.765297		-0.005268
		1.23105		0.187846
		1.5418		0.03408
		-0.595318		2.49593
		0.902294		1.86759
		-0.413543		1.43802
		0.381783		0.208453
		0.361639		0.08374
		1.79857		0.663428
		-0.504163		-0.250949
		0.921777		0.745925
		-0.014091		0.512122
		0.012936		1.36774
		1.29401		-0.179783
		-0.036679		0.597756
		2.1123		0.387235
		1.23284		-0.076596
		-1.45195		-0.985208
		2.60425		0.327659
		2.09155		0.546735
		0.440296		1.4208
		1.603		0.540609
		1.29776		-0.427518
		0.334329		-0.905871
		-0.20048		0.198498
		1.26489		-0.847009
		1.20987		-0.063636
		1.20881		0.526915
		0.898331		0.472674
		2.33529		0.153119
		1.03635		0.196778
		0.556928		-0.042339
		-0.145652		-1.17695
		0.942048		0.49913
		0.517465		1.0813
		-1.33546		1.25871
		-0.537597		0.41271
		-0.129361		-1.16263
		0.673597		2.68667
		-0.266469		0.940468
		0.522474		0.90517
		0.992784		0.631086
		2.45172		0.201196
		0.161213		-0.111267
		-1.23186		-0.330676
		1.59388		0.266913
		0.969161		-0.178336
		-0.24532		0.314681
		-0.148417		-0.271656
		0.539563		0.645613
		1.32824		0.899756
		0.533697		0.482648
		1.03086		3.11966
		-0.425591		0.573074
		-0.945653		1.68478
		0.403794		1.68256
		0.446229		0.413597
		-1.11614		0.345418
		0.841735		-0.279636
		0.572581		-0.122582
		0.448577		0.414088
		0.628681		1.13967
		0.542101		-0.061498
		0.284335		0.439895
		2.97278		1.02081
		1.51865		0.890998
		2.47388		0.244455
		0.881633		0.822247
		-0.278752		0.197054
		0.984853		1.93956
		0.391781		3.00438
		0.41131		0.564834
		-0.600601		2.09817
		2.9359		0.231876
		-0.35866		0.098642
		0.243761		-0.383467
		-0.109758		-0.199901
		-0.217952		0.786394
		-0.580443		0.200604
		-0.108783		-0.17354
		0.454694		1.22424
		2.38993		2.4861
		-0.793246		-0.1962
		-2.91014		1.5619
		1.9759		0.462041
		0.570569		0.646887
		0.156302		1.89959
		0.051273		0.523368
		0.006488		0.890223
		0.169288		1.30266
		0.610888		-0.844143
		0.951113		0.734084
		0.823113		1.64424
		0.97824		0.889364
		3.67032		-1.25564
		-1.0596		0.32142
		1.60855		1.24666
		0.255569		0.393901
		1.24204		-0.277312
		-0.339614		-0.548768
		1.51428		1.39885
		1.71459		1.61801
		0.59817		-0.000335
		3.1892		0.595255
		-0.509709		0.845215
		1.60906		0.866192
		0.085349		0.286326
		0.817079		0.99004
		1.61786		0.348355
		-0.115914		0.46286
		1.38217		-1.25215
		-0.626611		0.808673
		-0.729969		0.884342
		0.747104		0.469557
		0.278505		-0.273978
		-0.652865		0.702775
		0.568895		0.90895
		-0.554123		1.15326
		1.83882		0.554601
		-1.04787		0.890608
		0.693825		0.228415
		1.06666		-0.608285
		0.273283		1.40783
		0.836307		0.595834
		0.055992		0.209432
		0.353227		1.09834
		1.08533		1.11701
		1.10084		-0.202857
		0.292004		0.738217
		0.427384		1.54968
		-0.214167		-0.319479
		-0.097466		0.640486
		0.941257		2.71897
		-0.010822		-0.582979
		-0.376029		-0.216813
		-0.376788		-0.87842
		0.068684		-1.21061
		0.242628		0.318662
		-0.252475		1.52424
		1.42505		1.47173
		0.418575		1.17675
		-0.440939		0.50542
		-0.28469		0.066181
		-1.68391		1.88995
		2.45408		1.46201
		-1.04876		0.579215
		1.33963		0.549614
		0.088687		0.801946
		0.849364		0.036396
		0.081098		1.20538
		0.446331		0.226828
		-0.558673		-2.8602
		-0.086605		2.03257
		0.964686		0.573607
		0.357556		0.085329
		-0.63279		-1.52118
		0.745889		2.09159
		-0.092431		1.53854
		0.278102		0.484585
		1.33731		0.89374
		0.776514		1.5863
		0.721792		-0.680997
		0.348822		1.20263
		-0.534753		2.14189
		0.2407		0.117841
		-0.918491		-0.382329
		1.04573		1.02197
				1.80524
				1.98306
				2.18167
				-0.083618
				1.90819
				1.13123
				0.453187
				0.863861
				1.63678
				1.02298
				-1.87904
				-0.929533
				1.19686
				0.897003
				0.857979
				-1.08035
				-0.668414
				0.28594
				0.22752
				0.736878
				0.283977
				0.581595
				1.09715
				1.29662
				0.787243
				1.0935
				2.24857
				0.355243
				-0.317593
				2.40663
				-0.570586
				0.90935
				1.59081
				0.943399
				0.575969
				3.2125
				3.26104
				1.47292
				0.297154
				0.467192
				0.214706
				-0.155864
				0.252324
				-0.600325
				1.10786
				-0.453972
				-0.357344
				-0.90046
				0.470302
				-0.005217
				0.209687
				0.044911
				0.915345
				1.99415
				0.822125
				-0.522478
				-0.115687
				0.186873
				3.12949
				0.754225
				0.854484
				0.686484
				0.086023
				0.378978
				1.40688
				0.625117
				-0.249652
				-0.395971
				0.839631
				0.387335
				0.38225
				0.122646
				-0.049971
				-0.340743
				2.9666
				2.01169
				0.241868
				0.398975
				-1.03391
				-0.013331
				1.53012
				0.740079
				0.321558
				0.70707
				0.68883
				-0.119413
				0.95781
				0.93942
				0.657493
				0.92256
				0.403749
				1.0779
				0.534712
				0.337287
				0.85764

## Sheet: F stats
Figure 6F	Prediction 1: Junction length
	Comparision of circum. T1 vs circum. baseline	linear mixed model
		p = 3.67E-08
	Comparision of radial T1 vs radial baseline	linear mixed model
		p = 0.000249123
	Comparision of circum. baseline vs radial baseline	linear mixed model
		p = 0.008672162

## Sheet: G
Figure 6G	Prediction 2: Angles opposite shrinking junctions
	circum. T1	circum. baseline	radial T1	radial baseline
	19.5928	-3.16322	1.29419	23.152
	8.1892	-8.91024	10.8786	-7.86349
	-2.07122	-14.9324	32.5828	-10.9367
	5.89399	12.4491	-9.87809	-15.5839
	3.93052	-2.71487	11.4447	-5.76886
	-25.6408	1.00798	4.89391	7.51125
	-2.84541	-3.38957	-21.3597	13.8367
	-0.300121	5.73263	12.3732	7.08693
	-9.44556	-22.4435	18.5282	20.3922
	21.7571	-9.18174	7.78873	-16.8898
	-9.32206	-13.8743	33.9279	-30.6212
	-0.667755	-17.3546	28.8727	21.0142
	-20.7523	26.4417	20.8117	-27.1896
	-17.961	-9.47977	11.7138	17.3901
	27.4398	3.02433	-25.4239	-23.5947
	-0.789467	-10.4515	5.89402	10.1669
	-8.92306	-8.90003	-5.08794	16.9192
	-12.6991	-31.8279	18.2994	20.6321
	8.99406	-29.6772	0.615238	1.91279
	4.83919	-2.57371	-2.01654	-24.2551
	27.4799	-0.720642	-12.9753	-26.729
	24.807	-18.0551	-1.92405	24.2554
	-12.3354	3.56898	13.7789	0.746998
	-35.7681	-24.0647	-16.3872	-20.4733
	-3.76079	-2.26506	22.1782	-30.7115
	3.8525	-3.82154	49.8525	20.5319
	-21.4024	3.51061	23.4926	5.58965
	15.2902	-3.91738	24.5696	-18.4094
	-31.6059	2.98493	0.718491	31.5167
	-30.4471	-16.1034	-38.4724	14.3713
	2.71967	15.4272	16.3665	7.18804
	-18.1613	-11.268	-9.62602	14.4363
	-26.481	-7.95236	6.84706	4.12645
	-43.9478	-29.1054	19.23	28.2195
	7.55196	10.3806	14.707	-8.40183
	-5.3478	-25.1432	33.8713	12.0751
	-29.4184	-10.782	18.6059	16.4615
	-4.53702	-3.65308	25.7098	17.774
	-69.2992	-2.56258	5.11345	2.92886
	-12.7936	3.9845	8.47648	3.41783
	6.6253	10.682	9.64129	2.86929
	-10.6725	-24.4668	16.9379	-3.9236
	2.32697	26.1861	18.1734	-7.64596
	5.24952	25.4575	-3.64982	-16.037
	-13.2121	-18.2838	28.0864	6.35928
	15.2737	-14.3733	14.8904	7.01566
	11.8044	19.6072	3.50968	21.0814
	6.59039	-8.92258	-17.1669	-7.39655
	-24.2803	-36.7236	-1.11851	-0.972912
	-6.47104	23.7141	-15.4237	11.9941
	-11.4975	-25.4253	14.6881	5.04172
	-24.5741	-17.3042	11.9546	-44.662
	-21.7425	-15.512	9.81922	16.6849
	16.344	-9.56678	9.39439	-23.9925
	3.71407	14.922	14.7555	12.2686
	-8.02636	7.22234	2.49583	13.3971
	-2.15306	-41.4357	-1.85906	4.01141
	-0.10524	-14.9386	-6.26306	54.8088
	-6.9627	-21.6076	-36.7826	16.8973
	-23.0769	-13.4801	8.95558	-7.52915
	8.86634	12.5034	-24.1764	5.8614
	-18.6384	-8.62025	-19.1239	-0.794411
	32.1339	-29.0121	-27.1898	-6.56712
	8.96347	-28.8487	5.37025	5.2373
	35.581	-5.74693	8.46732	-9.82859
	18.2343	-3.31637	-6.94492	23.3203
	-30.307	11.1564	9.94075	-1.57341
	-30.3339	2.39373	10.9218	-4.52395
	-0.928532	-16.3699	-12.356	2.30994
	1.71812	-5.38111	20.6023	13.918
	-10.0526	32.8558	-18.9252	-6.89865
	-12.2874	-0.887436	23.283	0.311726
	12.8451	11.8078	-7.35042	3.89734
	-8.89485	7.96317	-0.507328	-21.0645
	-0.098072	6.96462	-5.60986	-4.72191
	17.6447	-12.129	-4.91451	9.867
	-9.01108	-7.05901	30.5493	-16.7005
	-34.3645	24.9541	14.0518	6.60704
	23.2052	9.91356	14.5094	15.7507
	-24.126	-16.525	-18.3676	-3.52747
	-6.64614	9.21479	25.0642	20.5933
	-34.2419	1.15805	15.2196	4.07999
	0.438885	-16.1981	-7.66018	32.5721
	8.11926	7.90977	43.314	31.0289
	-13.8929	-5.29353		-3.57991
	-6.91289	-7.97729		1.20003
	-4.70381	24.4947		-17.6017
	-21.5327	-0.381645		16.7407
	-13.4459	22.8642		12.7538
	4.30242	6.77166		4.90765
	5.3167	-18.672		29.4891
	3.9945	1.93689		-1.62495
	-0.332802	-7.62946		39.4438
	-4.25566	-3.64748		23.4285
	1.11974	-9.26144		24.1613
	-21.2027	-12.8929		-23.9143
	0.890533	-12.4439		4.58629
	-25.1438	17.5335		-12.8371
	-37.6529	6.0123		6.70155
	-12.25	17.0455		15.1967
	-16.5753	-4.32931		0.785431
	0.221073	-1.37308		8.88684
	6.08704	10.4213		-13.2175
	11.1215	-0.511173		16.2908
	-1.91444	-11.4334		17.1479
	1.41857	10.6727		-1.2668
	-2.30181	-4.56765		13.8014
	19.34	-1.67354		-0.311264
	34.4957	-10.9678		13.5085
	-2.5563	-3.73498		-6.89706
	4.29081	-0.332806		-2.68164
	-10.7881	22.4286		12.4787
	24.8296	10.6133		-0.308052
	-2.0035	-23.2549		-30.8608
	-22.2755	0.141277		4.08508
	21.9963	4.58102		33.0169
	-13.4927	-22.4573		-10.4164
	13.6139	3.92446		-5.98742
	-6.93938	5.43063		20.612
	-1.06274	1.52219		-16.3072
	10.6542	11.938		-17.1405
	9.18101	-27.2803		10.4379
	-16.9175	15.5131		-13.6298
	-10.2974	3.39184		-11.6486
	-0.734184	-3.34485		-18.0272
	-15.939	10.3954		-6.15537
	-24.4092	7.7253		8.33815
	-7.50914	9.1134		9.71758
	-14.0965	-9.78648		-2.79055
	-29.4887	-14.7426		-11.4617
	-24.2902	-13.6854		8.06712
	-7.78239	-32.0895		9.34496
	17.4936	-26.5115		19.901
	4.61168	-20.0226		0.554333
	-7.02477	5.02821		7.22995
	-4.6238	-11.7732		2.03079
	1.52188	-19.9624		-2.95743
	-0.512825	12.0456		29.9311
	7.52984	14.808		14.9075
		-12.2952		8.83958
		-40.6645		-1.82405
		-26.6988		13.9772
		-44.3886		-3.28693
		4.09281		-30.6582
		-14.3248		11.3093
		34.2458		-13.5977
		1.4043		-4.00265
		3.67643		7.31569
		-12.4002		2.65115
		22.482		1.32467
		-14.7465		-0.421669
		-44.5508		-33.09
		-3.87625		-18.9987
		-2.6545		19.6057
		-15.6657		-18.3327
		-14.1552		-11.7655
		-8.64853		-10.3301
		-4.81601		26.4191
		-14.5532		-13.9189
		4.90561		-5.76786
		-10.0439		-9.07866
		-19.6266		-1.91079
		17.5601		3.36575
		-8.02896		-3.62115
		-28.2684		12.7477
		8.30077		-3.56257
		-21.0941		-29.0908
		-41.2196		-9.7096
		-19.0424		-22.8084
		-3.30727		19.4667
		-5.29596		-2.4402
		-26.905		6.12929
		17.5389		-13.1611
		-11.9022		6.14828
		7.0025		2.61257
		-24.7693		7.11186
		-26.6058		-10.0497
		13.1287		-22.2575
		7.67649		-22.5574
		18.868		8.5664
		0.224525		16.5308
		15.2775		45.5095
		-53.8227		-10.2389
		-14.4389		-24.5657
		-16.6045		12.7452
		-35.8016		-7.91775
		32.823		-10.9365
		-10.0104		17.8591
		-4.25729		9.02482
		-18.8477		5.53887
		-22.229		13.4097
		14.159		19.2496
		-32.2892		2.84049
		-12.0042		4.63567
		-16.6325		-2.96762
		11.4841		-2.01593
		14.9722		-38.3308
		-31.5392		27.7484
		2.19307		37.3638
		-39.9005		6.42135
		-11.4504		11.2718
		-6.54447		-8.58297
		-22.5229		13.527
		-32.4742		-28.9335
		-1.87017		37.6045
		8.38261		6.08732
		-24.4916		5.57531
		-27.5646		-11.914
		-17.7164		10.2498
		-25.0596		10.0944
		-3.22525		-6.30436
		-14.5977		-40.0044
		-12.9173		0.365536
		-6.98457		28.19
		-9.02859		20.882
		1.8655		-1.38394
		-33.713		17.8979
		-25.8365		-14.3679
		-10.4116		24.4635
		2.36726		4.88561
		6.2635		-25.435
		4.91937		12.0894
		15.6332		2.43112
		10.1995		26.6319
		16.2679		1.77587
		-24.5323		7.62646
		-27.2232		8.1599
		-29.7236		-34.6059
		11.3985		13.3116
		11.6807		-22.4867
		-19.9202		43.9736
		-2.58598		3.66888
		-1.32655		13.1661
		-20.3346		26.9034
		22.1748		7.75846
		1.00128		-1.6253
		7.44176		-38.9812
		-16.6829		-1.44004
		-9.71352		2.37809
		21.4896		-13.3513
		-25.3502		15.1067
		-11.9568		-2.4203
		-14.6461		18.3571
		52.6094		0.978397
		-25.7354		-15.2468
		-24.8835		-16.8149
		-41.9211		29.7279
		-10.2023		25.8463
		8.5798		19.3043
		-14.302		8.37854
		-7.36208		4.43513
		-26.4269		-1.77794
		-14.5325		39.7699
		30.6725		21.6599
		4.78662		13.8607
		-4.46463		-34.1654
		-32.4798		-8.14181
		-34.3329		9.977
		-41.1478		-7.54319
		-34.4956		2.70613
		-17.6171		34.1377
		22.0328		-6.63029
		1.93786		1.55992
		-52.9306		17.1261
		-21.869		-26.7541
		5.26703		62.4214
		-4.70293		-27.4287
		2.01282		20.0537
		-8.31101		21.6454
		-3.0627		18.9344
		30.4544		-17.663
		-9.85534		18.499
		6.79297		-7.51847
		-37.6811		6.96903
		-8.36926		-5.1444
		12.0246		11.4474
		-4.50863		1.33613
		-1.26074		37.1668
		-18.486		20.805
		-46.8017		-5.51629
		-4.1703		11.6151
		-48.21		23.8969
		-7.67023		8.99114
		-42.9583		6.1115
		-44.0742		5.74984
		21.9347		9.14523
		31.0216		-16.2834
		-4.66155		-2.16643
		-11.6549		6.1492
		-1.58113		10.5989
		2.48328		1.26998
		-13.66		4.13762
		0.298824		16.0167
		-18.8348		-26.4045
		-49.5779		-34.041
		-9.03604		1.24439
		-9.24028		11.1459
		-47.1108		20.9135
		-14.0486		-15.4127
		-21.2445		23.8544
		5.94523		-42.5219
		-9.11843		21.3966
		27.3776		-1.04045
		24.7258		1.61332
		-23.1886		3.85637
		35.8915		-9.31041
		-11.5304		-14.7776
		9.14527		25.1739
		-9.36017		25.0887
		-6.87902		3.70068
		-8.14351		8.6613
		2.21393		16.8864
		-3.66542		16.0763
		-26.1918		1.05347
		-25.5341		10.3166
		0.684475		13.9898
		3.87034		7.02481
		23.4805		29.3611
		-11.5254		-12.9368
		-2.56429		16.0385
		-4.85503		0.26012
		12.3767		6.78699
		7.24196		34.1947
		-2.30716		14.8585
		-13.8632		-8.84897
		3.78552		9.91507
		-13.8213		31.4105
		11.7188		-27.5904
		-18.8738		35.9796
		3.73706		30.5752
		6.08385		13.5526
		4.08076		-3.92477
		-20.949		4.40372
		29.6111		-0.843517
		-6.04248		13.2803
		-31.8625		32.1852
		15.9338		26.206
		-4.33414		4.22028
		37.2503		26.6982
		-8.95312		15.8246
		-4.81615		21.3473
		1.94213		16.1362
		19.0464		-7.36199
		37.9722		15.8147
		4.55587		13.6008
		24.7409		-13.2944
		-20.0268		-4.07859
		-4.83603		-7.32414
		-14.4994		6.40858
		12.9573		10.5696
		-1.29101		27.5334
		4.12137		-16.4079
		-8.74126		28.9008
		11.5628		-20.009
		-13.49		11.9625
		-25.8325		1.50147
		-12.3342		46.2105
		15.851		5.41815
		8.28181		-26.5147
		-37.841		-33.1022
		-34.0297		-20.3845
		-10.104		8.29675
		-10.6239		9.98323
		-15.1588		-0.295307
		10.8829		0.149826
		26.3196		11.8832
		0.878166		-10.7613
		14.6632		31.8791
		-13.8345		13.61
		-37.1916		22.0722
		-20.6083		-1.31129
		-2.5095		-9.70604
		-2.23361		9.24029
		-23.1958		16.2093
		16.4066		-22.8627
		-10.5718		23.3228
		8.63668		-3.68952
		-11.1523		25.3707
		-22.7372		12.174
		11.3424		-3.25114
		-22.2131		27.5284
		-3.85049		-15.4906
		6.9877		9.236
		-3.8361		2.57897
		-0.436901		-16.1355
		1.13635		-11.7997
		-14.9111		39.2171
		-8.96512		-2.44038
		-0.716003		20.3403
		-20.5041		-18.0532
		-0.656834		-21.1494
		-17.4		6.15202
		9.09229		2.26984
		21.0071		19.3243
		-11.4628		-5.7442
		15.12		36.1853
		34.0972		7.40852
		22.3221		1.8339
		18.2479		-10.6939
		-43.2246		7.79261
		6.4466		7.23546
		7.48526		19.0256
		24.3598		16.4341
		-1.29097		-17.2545
		-41.8186		-10.3373
		7.07024		15.9745
		-15.3669		-10.9218
		-41.6333		17.5813
		-15.0447		18.8508
		-12.2056		-19.4453
		2.8429		3.73369
		-17.7533		39.0174
		6.15639		22.8087
		20.3464		4.18066
		3.24776		-13.0645
		3.17223		-17.6417
		43.3222		14.2143
		6.27908		-12.0512
		9.00429		0.535782
		-0.222801		14.761
		-4.08046		1.3096
		-15.0036		3.52965
		11.7238		-37.0716
		-36.7197		4.25689
		-23.0309		-2.19378
		-13.2689		-13.2545
		-9.69826		-13.7648
		-8.31219		6.08553
		-22.0482		-8.21156
		-58.1986		22.0377
		-28.2722		-0.208672
		-2.9416		6.98278
		-16.7206		3.47466
		-13.223		8.126
		-14.6186		-19.0647
		7.02101		7.83541
		-7.3666		5.55984
		-3.89345		13.8519
		-4.13129		-12.7776
		50.7753		-10.905
		4.14838		21.5737
		6.04015		6.00702
		-22.9843		2.22373
		-13.541		10.2219
		18.1865		19.7139
		14.7006		-16.8115
		-18.1119		25.828
		-3.61779		-1.38776
		9.94241		26.2952
		8.68438		2.44949
		-0.753403		10.1146
		0.23584		20.2623
		18.0972		18.9099
		-10.0256		11.3941
		-18.5905		9.87931
		-17.5229		5.34936
		8.19881		-19.8991
		-11.0221		-12.1041
		23.734		19.9583
		-12.7048		-0.116127
		-0.965275		-4.74014
		-48.3648		7.6282
		-22.0935		-11.6153
		8.88316		25.7752
		16.8788		12.7291
		-12.7224		-11.2734
		10.3146		15.8329
		-11.9991		35.2107
		-3.49517		24.5449
		-18.4795		13.4193
		47.1141		4.6245
		-39.7498		23.513
		-45.2878		5.46204
		-30.9638		11.9262
		-8.41043		25.2356
		-0.73835		-8.54636
		23.4394		-8.43229
		-48.2956		21.232
		9.8265		-22.0282
		-25.957		-14.215
		-9.32		1.61101
		25.6304		9.51354
		20.5003		-0.518677
		-1.11688		19.255
		-17.8472		-0.881165
		22.7473		0.217148
		-3.7382		7.84057
		1.52401		-38.532
		0.366695		2.94799
		1.01757		21.1119
		-10.4484		19.4513
		-10.4085		0.239548
		35.9785		-27.4025
		2.4699		8.38952
		-9.31367		15.0311
		-11.9297		38.3674
		-8.3781		-37.2882
		-53.5582		-15.24
		-27.504		15.1511
		-9.76059		19.9951
		19.0866		-4.87463
		-13.5915		32.8723
		4.9417		23.3304
		18.1372		8.98226
		-29.7869		21.3569
		20.4142		-42.7207
		-5.59947		13.0074
		1.94856		-24.1118
		-2.17567		-22.519
		-0.430786		2.93823
		-4.52685		14.2467
		-13.5552		-8.53571
		-9.13152		-32.609
		5.4309		-30.4478
		-9.38748		-4.00286
		-4.67095		7.9428
		-5.77666		-2.15599
		-4.89703		-38.7641
		-21.3448		18.198
		-32.6834		20.6313
		15.684		12.9048
		4.23937		24.2322
		39.35		5.72251
		6.87273		10.4568
		5.97729		2.7262
		-39.5536		29.9215
		10.9726		-48.8693
		-0.241409		18.875
		-11.4952		24.4802
		-4.54007		13.5113
		-9.76878		-10.7928
		-9.40762		16.9428
		-19.7512		12.3416
		10.8476		13.2598
		-7.89318		-12.3793
		30.0776		34.6514
		8.22901		-0.510799
		-16.5022		8.38588
		-10.0529		-29.0204
		-26.0578		-41.5192
		13.4886		13.2583
		-34.2817		1.17068
		-3.07612		2.51538
		-14.2469		-30.2459
		2.04219		-6.30563
		12.2827		10.44
		9.26741		-7.33728
		29.8449		-25.8332
		-7.31501		8.25399
		-9.04705		2.3122
		-19.4392		12.7811
		-11.8242		12.2742
		14.0142		9.33994
		-17.2549		6.13489
		-1.86228		-11.2745
		-18.0722		-21.6933
		-3.4569		24.4513
		19.9304		1.41373
		-35.9077		8.2045
		10.0664		37.4816
		-8.87234		-12.4123
		-5.95568		7.36053
		-5.86313		43.2228
		0.874889		8.83076
		11.954		-25.3078
		-7.9481		-3.18253
		-0.040726		7.18662
		-5.49674		-10.6147
		-69.1193		-19.649
		-0.581779		30.1763
		4.16321		-35.438
				-2.787
				-21.3365
				-38.3862
				18.591
				4.69859
				-25.3614
				-5.82712
				11.6268
				7.14301
				10.9092
				29.7218
				1.19677
				-30.0981
				-7.91649
				20.4297
				8.75369
				-31.2742
				-2.80923
				-10.1468
				6.84725
				15.4399
				8.34069
				-1.74442
				-6.61942
				-12.4946
				8.01172
				12.6345
				6.74218
				-5.33264
				3.77846
				-1.37518
				-1.16663
				38.6484
				-23.1653
				-1.80832
				-28.649
				21.4256
				12.7126
				27.4431
				42.4947
				-37.1154
				-15.3934
				-3.43057
				-6.34996
				4.63423
				10.2666
				-0.525528
				8.24803
				-3.18076
				6.21648
				-11.3011
				4.46147
				-5.01316
				5.82977
				11.3514
				3.68951
				2.83913
				4.5785
				7.92693
				24.3192
				8.72014
				-10.1227
				-10.9845
				-1.62446
				-12.6462
				-4.8544
				2.73701
				4.17024
				9.83412
				6.14014
				20.9038
				-6.26893
				-6.11003
				4.86753
				4.69339
				18.9805
				2.88079
				15.0191
				0.29113
				38.3686
				-11.1175
				-12.8632
				0.674698
				-28.154
				-18.2525
				13.0875
				-4.82264
				35.4562
				2.15202
				8.51081
				-14.4788
				11.1409
				60.8469
				-16.0812
				10.9534
				9.36889
				-13.0225
				-0.669998
				8.32799
				15.6788
				-2.29218
				-0.609756
				-1.36584
				2.95087

## Sheet: G stats
Figure 6G	Prediction 2: Angles opposite shrinking junctions
	Comparision of circum. T1 vs circum. baseline	linear mixed model
		p = 0.577203475
	Comparision of radial T1 vs radial baseline	linear mixed model
		p = 0.178183667
	Comparision of circum. baseline vs radial baseline	linear mixed model
		p = 2.49E-17

## Sheet: H
Figure 6H	Prediction 3: Cell Elongation
	circum. T1	circum. baseline	radial T1	radial baseline
	0.198857	0.075935	-0.067197	0.135106
	-0.054739	0.271883	-0.068935	0.051511
	0.142406	-0.348317	-0.257394	0.254718
	-0.009811	-0.188375	0.316796	-0.212123
	-0.111897	0.125777	-0.237405	-0.066973
	0.085762	0.207947	-0.302505	-0.344104
	0.084688	-0.157152	0.184429	-0.361924
	0.051457	0.102953	-0.111104	-0.312958
	0.243081	0.213776	0.02794	0.417844
	0.080678	-0.048491	-0.091879	0.276133
	0.600925	0.050637	0.042969	-0.203663
	0.024085	0.126532	-0.533634	-0.115263
	0.225795	0.008699	-0.006041	-0.048969
	0.163829	0.161117	0.461455	-0.009686
	-0.309024	-0.106088	-0.276393	-0.127003
	-0.184235	0.152798	0.088371	-0.015995
	0.081055	-0.05452	-0.032382	-0.141229
	-0.221078	0.036403	0.069276	0.156469
	0.297193	0.134721	-0.00855	0.261888
	0.265475	0.28392	-0.005067	-0.046553
	-0.087935	0.106068	0.41208	0.069369
	-0.751578	0.077297	-0.003892	-0.027344
	0.146236	-0.166395	0.187537	0.218049
	0.331069	0.112677	0.296802	-0.001537
	0.075511	-0.146795	0.242282	0.337503
	-0.143542	-0.160744	0.33352	-0.246123
	0.12472	0.026102	0.243984	0.117245
	-0.421517	-0.109941	-0.353203	-0.197956
	0.092116	-0.018541	0.274764	-0.203265
	-0.398261	3.5e-05	0.090127	0.046802
	0.42167	-0.247495	-0.494431	-0.193866
	0.207057	0.013767	-0.200467	0.059042
	0.446714	0.21499	-0.302229	-0.00211
	0.273037	0.215248	-0.263621	-0.151962
	0.338647	0.356411	-0.164873	-0.038283
	0.292576	0.257106	-0.141791	-0.157335
	0.532572	-0.061573	-0.396412	-0.330212
	0.893872	-0.287242	-0.353861	-0.140362
	0.294711	-0.285777	-0.119266	-0.159659
	0.06358	0.274079	0.196594	-0.141259
	0.04008	-0.065586	-0.29816	0.047465
	-0.306523	-0.065805	-0.089844	0.061844
	-0.121982	-0.010045	-0.199283	0.204982
	0.010726	0.259693	0.056466	-0.078949
	-0.139205	0.123299	0.35331	-0.171546
	0.209727	0.072451	0.456115	-0.154361
	-0.046328	0.025803	-0.074816	0.089829
	0.695129	-0.005783	-0.091518	-0.022217
	-0.078988	0.024644	0.203885	-0.175423
	0.614998	-0.4173	-0.015123	-0.298256
	0.592325	0.041569	-0.185574	-0.151966
	0.456951	0.477918	-0.181024	0.019846
	-0.288556	0.611299	0.25781	0.149075
	0.012316	0.332587	0.165157	-0.242995
	-0.085619	0.168544	0.005857	-0.010884
	-0.021862	-0.360976	0.162423	-0.168811
	-0.026911	-0.285869	0.148183	-0.262243
	0.199735	0.178056	-0.214247	-0.416917
	0.230201	0.573239	-0.23187	0.116649
	0.052612	-0.054764	0.267954	-0.356194
	0.235544	-0.049875	-0.437107	-0.046209
	0.050555	0.305635	-0.444746	-0.106477
	-0.12401	0.337394	0.283556	-0.263354
	0.012487	-0.196898	0.588549	-0.078975
	-0.36474	0.274627	0.329201	-0.233766
	0.039938	-0.123626	0.669291	-0.191583
	0.074066	-0.184666	-0.004919	0.188608
	-0.072587	0.271132	0.088477	-0.074915
	-0.050057	0.100557	0.006626	-0.234201
	-0.062503	-0.043945	0.381646	-0.160359
	0.03485	0.304084	0.265789	0.106737
	0.078943	0.141804	0.002502	0.142841
	-0.074279	-0.307444	0.255175	-0.346447
	-0.079655	0.212096	0.337424	-0.207458
	0.190018	0.072412	-0.48213	-0.206112
	0.30209	0.020442	-0.160024	0.087844
	0.121214	0.320788	0.471392	-0.291779
	0.227662	-0.086894	-0.256717	-0.211399
	0.079077	-0.124943		-0.519871
	0.017384	0.164742		0.116688
	0.308741	0.043445		-0.025905
	-0.168817	-0.144009		0.286022
	0.04501	0.069061		-0.191497
	0.319532	0.3077		-0.151653
	-0.081224	0.182757		-0.25109
	0.207164	0.128048		0.15524
	0.290158	-0.065768		0.425559
	0.487966	0.030426		-0.499482
	0.124015	0.197154		0.066157
	0.145852	-0.144976		-0.099035
	-0.401353	-0.255824		0.467317
	0.254831	0.14363		-0.50944
	0.200289	0.114792		-0.102876
	-0.092103	-0.077892		-0.138435
	0.282591	-0.448333		-0.242347
	0.337131	-0.091787		-0.236851
	0.196147	0.14441		0.041648
	0.2969	0.19316		-0.360769
	0.236861	-0.376597		-0.120827
	0.2416	-0.292123		-0.25177
	0.017592	0.523463		-0.03982
	-0.167259	0.233683		-0.307243
	-0.104426	0.091365		0.211257
	-0.020176	0.096038		0.055585
	0.068231	-0.077271		-0.459284
	-0.19588	0.065932		0.296134
	-0.393501	-0.115969		0.232554
	-0.002939	-0.073325		-0.604508
	-0.136077	-0.107667		-0.116105
	0.014701	-0.149702		0.043044
	-0.344536	-0.048908		-0.074416
	-0.10367	-0.04832		-0.380301
	0.171135	-0.491973		0.317793
	-0.008397	0.23442		0.03093
	0.071877	-0.69709		-0.062676
	-0.015868	0.54476		-0.122593
	-0.188593	-0.037138		0.044056
	-0.41715	-0.511079		0.44152
	-0.268683	-0.03845		0.103904
	-0.358906	-0.247053		-0.072388
	0.136959	0.195138		-0.17055
	0.495884	0.310583		0.031193
	-0.047576	0.503711		0.275664
	0.121098	0.070459		-0.053601
	0.44186	0.147978		0.347696
	-0.109859	0.261892		0.107551
	0.183986	-0.05642		0.02673
	0.429772	-0.29504		0.097659
	-0.261824	0.254839		0.040373
	0.074538	0.537875		-0.262752
	-0.06021	0.414312		-0.254565
	0.059463	0.051766		-0.07902
	0.1278	-0.197691		-0.194766
	-0.143723	-0.07436		-0.094831
	0.04127	-0.097669		0.086956
		0.315971		-0.099207
		0.056628		0.276102
		0.232987		-0.300666
		-0.041472		0.131306
		0.245467		-0.214869
		0.543256		0.017322
		0.088343		0.42981
		0.216662		0.432699
		0.189242		0.316635
		0.154556		0.201027
		-0.053397		0.199155
		0.44826		-0.53899
		-0.350671		-0.059244
		-0.139379		0.227529
		0.235843		0.024714
		-0.461487		-0.149472
		0.038509		-0.40865
		0.8325		-0.148516
		0.65412		-0.321969
		0.22755		0.197557
		0.18504		0.683091
		0.317279		-0.138187
		0.00091		-0.063973
		0.175942		-0.437499
		-0.205309		-0.314832
		0.411527		0.034861
		0.358921		0.387682
		0.122337		-0.008056
		-0.048025		-0.188721
		-0.298149		-0.051351
		-0.642527		0.429378
		0.126386		0.109137
		0.00858		0.018771
		0.4559		-0.864868
		0.094898		0.116806
		0.007515		-0.18694
		0.195242		-0.231414
		0.003559		0.544999
		-0.094606		-0.600304
		0.151541		0.024256
		0.184567		0.24788
		0.035557		-0.442787
		0.222464		0.37872
		0.077135		0.11075
		-0.173517		0.048628
		-0.041021		0.352973
		-0.609382		-0.427993
		0.018053		-0.404928
		0.019314		0.009709
		0.019374		-0.138068
		0.155135		-0.240167
		-0.151158		-0.060676
		0.509507		0.182032
		0.944457		0.026353
		0.167456		-0.024455
		0.316339		-0.083398
		0.354482		-0.146759
		0.257654		-0.475096
		0.294549		-0.006938
		0.100367		-0.302613
		0.069543		-0.160994
		-0.035939		-0.47366
		0.111395		-0.088033
		0.208503		-0.471471
		-0.039795		-0.261826
		0.306096		0.257691
		0.20642		0.092187
		0.061819		0.183007
		0.030501		0.198384
		-0.091032		0.059181
		0.046783		-0.117168
		-0.305824		0.080157
		-0.074032		-0.052291
		-0.114408		-0.096077
		0.110836		0.186364
		0.17414		-0.188382
		0.195242		0.025696
		0.024873		0.052119
		-0.115942		-0.092756
		0.223432		-0.551413
		-0.112691		-0.023031
		-0.006513		-0.003072
		0.211864		0.049501
		0.077978		-0.105394
		-0.213364		0.68774
		0.317324		0.375673
		0.038577		-0.230607
		0.213781		0.113659
		0.028923		0.152445
		0.449858		-0.031036
		0.106699		-0.153304
		0.403283		0.167127
		-0.0203		0.138174
		0.238244		-0.063716
		0.355341		-0.352179
		0.090504		0.010366
		0.012267		0.102992
		-0.227805		-0.881397
		0.108455		0.115245
		0.314425		0.180245
		0.297606		-0.222935
		0.658703		-0.608964
		-0.689304		-0.14088
		0.011043		-0.139956
		0.056825		-0.230973
		0.204119		0.018086
		0.365475		-0.44919
		0.472293		0.103747
		-0.084824		-0.276103
		0.270997		0.648681
		0.056241		-0.920377
		0.507953		-0.118694
		-0.138995		0.075586
		0.277723		-0.053291
		-0.118788		0.081264
		-0.025932		-0.056803
		0.233373		0.231753
		-0.374454		-0.087921
		-0.010631		-0.099654
		-0.090251		0.109253
		0.013387		-0.382124
		0.196062		-0.210752
		-0.184681		-0.232266
		-0.584143		-0.181647
		0.064714		-0.216688
		0.084962		-0.120276
		0.140759		0.422147
		0.54841		0.660742
		0.498873		-0.133125
		0.596656		-0.125236
		0.0729		0.259752
		-0.376874		-0.143668
		0.066366		0.049298
		0.158096		-0.253152
		-0.067843		-0.292257
		0.029961		-0.153532
		0.183983		0.20114
		-0.009996		0.283123
		0.138248		-0.043158
		0.224226		-0.07777
		0.116025		0.004918
		0.025299		0.297369
		0.032476		-0.248457
		0.198599		0.156986
		-0.116626		-0.073406
		-0.1395		-0.161878
		0.170011		0.001264
		0.275906		0.012866
		-0.145408		-0.440602
		0.046344		0.286787
		-0.173285		-0.294586
		0.048663		-0.212591
		0.054495		0.098977
		0.305664		0.041374
		0.267515		-0.044514
		-0.314314		-0.171402
		-0.184106		-0.007069
		-0.132781		-0.160815
		0.031052		-0.109648
		0.391937		-0.197949
		0.087346		-0.023164
		-0.339841		0.165693
		-0.105137		-0.085919
		0.048537		-0.113346
		0.158405		0.008412
		0.454156		-0.052878
		0.226112		-0.000508
		-0.045153		0.507182
		0.315425		-0.381121
		0.093663		-0.417074
		0.023399		0.483393
		0.185794		0.429681
		0.086634		-0.266683
		0.069325		-0.168224
		0.067234		0.091431
		-0.243332		-0.237314
		0.011875		-0.331765
		0.074683		-0.06353
		0.098303		0.00435
		-0.000938		-0.312692
		0.04217		0.014987
		-0.189225		-0.053545
		-0.168262		0.194464
		0.147978		-0.123235
		-0.048577		-0.061024
		0.465474		-0.282481
		-0.043746		-0.129289
		0.009589		0.067627
		-0.164136		-0.123118
		-0.015274		0.078503
		0.080406		-0.231278
		-0.050975		-0.120805
		0.255392		-0.264209
		0.238092		0.149813
		-0.006049		-0.227954
		0.093424		0.037214
		0.202498		0.101433
		0.291274		-0.02229
		0.042811		-0.131305
		-0.047777		0.253488
		0.117584		0.127367
		-0.226689		-0.272078
		-0.308374		0.38897
		0.005058		0.079972
		0.086854		0.153964
		0.123277		-0.167763
		0.312506		0.041552
		0.526737		0.065807
		0.114283		0.261874
		-0.322017		-0.137362
		0.116719		0.010649
		0.230386		0.285589
		0.07814		0.054477
		0.091364		-0.253465
		0.059391		0.034705
		0.118094		-0.820442
		-0.016935		-0.208401
		0.045151		-0.189691
		-0.2459		0.014115
		-0.187626		0.144218
		-0.06839		-0.388177
		0.306655		0.176101
		0.233631		-0.051691
		0.336511		-0.133023
		0.033492		0.201758
		-0.260435		-0.140814
		0.134502		-0.247456
		-0.07193		-0.099888
		-0.12792		-0.072756
		-0.125694		-0.110209
		0.142516		-0.08715
		0.045347		-0.187369
		0.052142		0.072138
		0.142333		-0.043137
		0.105824		-0.079945
		0.137244		-0.148217
		0.009334		-0.18647
		0.268688		-0.02875
		0.669268		0.237256
		0.168076		0.053209
		0.293294		-0.075456
		0.18535		0.09377
		0.285329		-0.183473
		0.264829		0.065351
		-0.27378		0.138887
		-0.012238		0.04218
		-0.336581		0.057535
		-0.184999		-0.058126
		-0.211138		-0.192523
		0.408735		-0.058708
		-0.578063		-0.047807
		0.109232		-0.204115
		-0.103851		-0.06493
		-0.179162		-0.174927
		0.24889		-0.015383
		-0.086626		-0.275987
		0.440042		-0.163184
		0.193498		-0.11255
		0.032877		0.071757
		-0.389523		-0.456246
		0.096542		-0.043012
		0.350012		-0.406831
		0.457628		-0.265889
		0.310541		0.312292
		0.092688		0.07127
		0.165387		-0.006875
		0.030483		-0.069089
		0.012394		-0.058708
		0.258318		0.053799
		0.112575		0.147768
		-0.498878		-0.464274
		0.005267		0.266843
		-0.198521		0.051761
		-0.113961		-0.211408
		0.205586		0.076691
		0.342725		-0.351196
		-0.25037		-0.057542
		-0.221731		-0.211711
		0.272711		0.078033
		-0.237592		-0.174648
		-0.373149		0.259467
		0.088475		-0.06446
		-0.221563		-0.093491
		0.147545		-0.043471
		0.222988		0.322681
		-0.214713		0.474269
		0.334589		0.43377
		0.855318		0.309846
		-0.093451		-0.174021
		0.246201		-0.143893
		0.203956		-0.283924
		0.118573		-0.018578
		-0.289291		-0.034896
		0.637074		0.065103
		0.397225		-0.113802
		0.012069		-0.243523
		0.073654		0.224814
		0.327188		-0.086733
		-0.151937		-0.105889
		0.128507		0.407173
		0.05121		0.144369
		0.21278		-0.199764
		-0.557077		-0.001588
		0.317985		0.050738
		0.809929		0.049725
		0.141944		0.047942
		-0.110753		-0.086671
		-0.083286		0.218049
		-0.005001		-0.002365
		-0.151477		0.07687
		-0.039351		-0.233255
		0.263087		-0.044135
		0.302542		-0.061613
		-0.089313		-0.060822
		-0.223238		0.03074
		0.356967		0.367351
		0.166296		-0.149312
		0.01837		0.047073
		-0.051105		-0.154152
		0.222044		0.397678
		0.120676		0.12757
		-0.10633		-0.360315
		0.540198		-0.510378
		-0.087599		0.537582
		-0.92421		-0.201538
		0.026261		-0.198891
		-0.619602		-0.379129
		-0.015578		-0.128529
		0.127932		0.133736
		0.056955		0.030154
		0.05554		-0.218116
		-0.344402		0.146413
		0.098154		0.041698
		0.421802		0.256519
		-0.208676		-0.360417
		-0.173706		-0.130884
		0.214966		0.131875
		0.034182		-0.442536
		0.044534		-0.212019
		-0.276957		-0.130011
		-0.075539		-0.240927
		-0.275528		0.15338
		-0.226232		0.04995
		-0.079716		0.103868
		0.08714		0.196779
		0.195126		-0.141488
		0.519556		-0.072448
		-0.448693		-0.18461
		-0.156039		0.069722
		-0.436359		-0.128517
		-0.125172		-0.205991
		0.058956		-0.206286
		0.245638		0.034101
		-0.34008		-0.382322
		0.112307		0.108052
		0.169159		-0.16728
		0.2906		0.502651
		-0.254123		0.445688
		-0.034082		0.022275
		0.345383		0.033758
		-0.619475		-0.024639
		-0.039017		0.366065
		0.338723		-0.000487
		0.050288		-0.170959
		0.106922		-0.173129
		-0.049764		-0.062391
		0.56091		-0.108969
		0.136318		0.069676
		0.164628		-0.290927
		-0.197844		-0.03583
		-0.168567		0.042725
		-0.12314		0.044264
		0.398794		0.490047
		-0.070582		-0.811607
		-0.2615		0.064712
		-0.503643		0.090857
		0.007706		0.065051
		-0.059505		0.363124
		0.098263		-0.246184
		-0.049157		-0.165373
		-0.304214		0.1978
		0.000311		-0.199775
		-0.287565		0.391874
		-0.096612		0.359401
		-0.237046		-0.380183
		0.011618		0.159236
		0.095479		0.170253
		-0.16171		0.356111
				-0.597269
				0.188721
				-0.594272
				-0.052832
				0.039984
				-0.083912
				0.089832
				-0.163651
				-0.544493
				0.134715
				0.459963
				0.319602
				-0.335455
				-0.022474
				-0.022856
				0.186884
				0.219304
				-0.122143
				-0.145682
				0.046687
				0.34423
				-0.081486
				-0.173148
				0.027272
				0.107105
				-0.240614
				-0.240604
				-0.033096
				0.005099
				-0.193021
				0.088517
				0.089048
				0.362226
				-0.242524
				-0.240361
				-0.558306
				0.179695
				-0.309549
				0.134556
				-0.227974
				0.001947
				-0.160893
				-0.034512
				-0.163377
				-0.574019
				-0.014232
				0.121578
				0.343021
				-0.208288
				-0.227372
				-0.087877
				-0.049595
				-0.228807
				-0.08404
				-0.149909
				0.156609
				0.235337
				0.296626
				-0.18367
				0.215996
				0.151286
				0.150952
				0.269036
				-0.045611
				-0.01758
				-0.313437
				0.257991
				0.029322
				-0.10855
				0.034197
				0.022566
				-0.170993
				0.104467
				-0.014201
				-0.675001
				0.543507
				0.228553
				-0.182417
				0.370953
				0.205625
				-0.075272
				-0.057212
				-0.177318
				-0.378808
				0.199287
				-0.182442
				-0.054673
				-0.234083
				-0.065955
				-0.018726
				0.225215
				0.301954
				0.103469
				0.030612
				-0.110374

## Sheet: H stats
Figure 6H	Prediction 3: Cell Elongation
	Comparision of circum. T1 vs circum. baseline	linear mixed model
		p = 0.627431042
	Comparision of radial T1 vs radial baseline	linear mixed model
		p = 0.06252777
	Comparision of circum. baseline vs radial baseline	linear mixed model
		p = 1.62E-10
