# Supplementary material for: Radially patterned cell behaviours during tube budding from an epithelium
Source: eLife. 2018 Jul 17;7:e35717. doi: 10.7554/eLife.35717 (PMC6089598; doi:10.7554/eLife.35717)
Supplement: Figure 7—source data 1. — Related to Figure 7B,E,F and I. [file elife-35717-fig7-data1.xlsx]

## Sheet: B
Figure 6B		Myosin fluorescence intensity on circumferential and radial junctions
	circ. junction number	circumferential myosin	radial junction number	radial myosin
	1	1.1829	1	1.2145
	2	1.4542	2	1.3416
	3	1.8505	3	1.2306
	4	1.5584	4	1.3966
	5	1.8661	5	1.0381
	6	1.3402	6	0.9964
	7	1.8752	7	1.2036
	8	1.6467	8	0.9181
	9	1.7925	9	1.3682
	10	1.6969	10	1.1444
	11	1.9076	11	1.2456
	12	1.4697	12	1.158
	13	1.5206	13	1.3905
	14	1.6742	14	1.4974
	15	1.3799	15	1.6006
	16	1.8701	16	1.674
	17	1.6927	17	1.2372
	18	1.9345	18	0.9685
	19	1.8291	19	1.2361
	20	1.7389	20	1.0656
	21	1.6565	21	1.2967
	22	1.6552	22	1.1339
	23	2.1673	23	1.7641
	24	1.5632	24	1.0128
	25	1.5261	25	1.2631
	26	2.1758	26	1.3482
	27	2.0415	27	1.3736
	28	1.8854	28	1.4265
	29	1.4789	29	1.4043
	30	1.7071	30	1.2053
	31	1.86	31	1.7593
	32	1.4634	32	0.9387
	33	1.7025	33	0.9058
	34	1.5998	34	1.1153
	35	1.6533	35	1.2238
	36	2.2476	36	1.4271
	37	2.2074	37	1.0568
	38	1.8457	38	1.3923
	39	1.9754	39	1.2827
	40	1.7446	40	1.0978
	41	1.7009	41	1.348
	42	1.8127	42	1.201
	43	1.8896	43	1.4895
	44	2.1784	44	1.086
	45	2.3163	45	1.416
	46	1.6983	46	1.4431
	47	1.9984	47	1.1848
	48	1.8297	48	1.3205
	49	1.4859	49	1.1517
	50	1.9065	50	1.1397
	51	1.6519	51	1.1985
	52	1.8569	52	1.4727
	53	1.9111	53	1.1875
	54	1.6267	54	1.1447
	55	1.6554	55	1.3002
	56	1.4452	56	1.3118
	57	1.901	57	1.6111
	58	1.4819	58	0.9588
	59	1.864	59	1.3015
	60	1.7067	60	1.3788
	61	1.3998	61	1.2904
	62	1.4328	62	1.0525
	63	1.4001	63	1.0875
	64	1.9969	64	1.12684
	65	1.998	65	1.07696
	66	1.93613	66	1.19444
	67	1.94115	67	0.949158
	68	2.075	68	1.11527
	69	1.93149	69	1.24599
	70	1.99288	70	1.07699
	71	1.9259	71	1.12534
	72	1.84114	72	1.21701
	73	2.27057	73	1.24037
	74	1.63049	74	0.88191
	75	2.04114	75	1.20376
	76	1.58422	76	1.18705
	77	1.79709	77	1.48512
	78	1.74671	78	1.0123
	79	1.92293	79	1.37537
	80	1.59977	80	1.14156
	81	1.86473	81	1.47948
	82	1.52886	82	1.18006
	83	1.64989	83	1.35682

## Sheet: B stats
Figure 6B	Statistics for Myosin fluorescence intensity on circumferential and radial junctions
	Comparision of Myosin [rad] vs [cir]	unpaired t-test
		p < 0.0001

## Sheet: E
Figure 6E	Bipolarity [pp per min]
		Bipolarity [radial]				Bipolarity [circumferential]
	Time	lower CI	Mean	upper CI	N	lower CI	Mean	upper CI	N
	-13.5	-0.00595225	0.00298465	0.0119215	207	-0.0119215	-0.00298463	0.00595226	207
	-9	0.00511631	0.0146126	0.0241089	522	-0.0241089	-0.0146126	-0.00511631	522
	-4.5	0.0148198	0.0208742	0.0269286	1115	-0.0269286	-0.0208742	-0.0148198	1115
	0	0.0118092	0.0185266	0.025244	918	-0.025244	-0.0185266	-0.0118092	918
	4.5	0.0111191	0.017232	0.023345	1091	-0.023345	-0.017232	-0.0111191	1091
	9	0.00608427	0.0131562	0.0202281	1125	-0.0202281	-0.0131562	-0.00608428	1125
	13.5	0.00566403	0.0132497	0.0208354	1047	-0.0208354	-0.0132497	-0.00566403	1047
	18	0.00984607	0.02115	0.0324539	484	-0.0324539	-0.02115	-0.00984607	484

## Sheet: E stats
Figure 6E	Statistics for bipolarity [pp per min]
	[radial] compared to [circumferential]
		Time	pvalues
		-13.5	0.636961
		-9	1.36e-07
		-4.5	4.66e-17
		0	5.19e-12
		4.5	2.59e-11
		9	3.77e-07
		13.5	8.38e-07
		18	2.82e-05

## Sheet: F
Figure 6F	Absolute unipolarity [pp per min]
		Absolute unipolarity [radial]				Absolute unipolarity [circumferential]
	Time	lower CI	Mean	upper CI	N	lower CI	Mean	upper CI	N
	-13.5	0.100241	0.106956	0.113671	207	0.101807	0.109646	0.117485	207
	-9	0.100148	0.109068	0.117988	522	0.0961263	0.10415	0.112173	522
	-4.5	0.107354	0.112799	0.118244	1115	0.0942854	0.0993496	0.104414	1115
	0	0.107182	0.113342	0.119502	918	0.0926493	0.0982874	0.103926	918
	4.5	0.110393	0.116216	0.12204	1091	0.0885374	0.0934503	0.0983632	1091
	9	0.110541	0.11729	0.124039	1125	0.0959934	0.102036	0.108078	1125
	13.5	0.124652	0.132187	0.139722	1047	0.100389	0.10713	0.113871	1047
	18	0.117201	0.12884	0.14048	484	0.0958842	0.105401	0.114919	484

## Sheet: F stats
Figure 6F	Statistics for absolute unipolarity [pp per min]
	[radial] compared to [circumferential]
		Time	pvalues
		-13.5	0.794498
		-9	0.155767
		-4.5	0.00244739
		0	0.00227286
		4.5	1.43e-07
		9	0.000327627
		13.5	9.32e-07
		18	0.000349054

## Sheet: I
Figure 6I	Myosin and Baz/Par3 fluorescence intensity on circumferential and radial junctions
	Junction	Circumferential myosin	Circumferential Baz/Par3		Junction	Radial myosin	Radial Baz/Par3
	1	1.77414	1.74947		1	1.17227	1.52134
	2	2.43601	2.78822		2	1.11519	2.05062
	3	2.77484	2.50213		3	1.16304	1.55592
	4	1.59428	1.82948		4	1.16441	1.68956
	5	1.91219	1.80773		5	1.59182	2.05987
	6	3.26583	2.21955		6	1.70033	2.448
	7	2.52242	1.83533		7	2.0358	2.04692
	8	3.02688	2.13141		8	1.5552	1.86023
	9	2.72062	2.26898		9	1.19235	2.03269
	10	2.98694	1.96241		10	1.32817	2.21874
	11	3.01092	2.95434		11	1.94323	2.05708
	12	2.7616	2.08501		12	1.7546	2.01444
	13	3.10788	2.37682		13	2.04341	4.54742
	14	2.46478	1.37425		14	2.09758	3.30261
	15	2.87037	2.51205		15	1.42303	2.20475
	16	2.12401	2.0623		16	1.26619	1.40515
	17	1.82414	1.05584		17	1.22308	1.45194
	18	2.15114	1.53923		18	1.36784	1.32074
	19	2.86169	2.15591		19	1.35845	1.60158
	20	2.05204	1.47628		20	1.87136	1.51144
	21	2.26572	1.32133		21	1.75643	2.3003
	22	1.95444	1.67114		22	1.54112	3.17426
	23	2.43268	1.74747		23	1.81484	3.04848
	24	2.50857	2.01552		24	1.52217	2.72923
	25	2.35181	2.07277		25	1.69193	2.07895
	26	2.17443	1.20115		26	1.63524	2.77616
	27	1.92708	1.40253		27	1.42922	2.02895
	28	2.12624	1.68276		28	1.73268	2.53602
	29	1.96254	1.24803		29	1.43196	2.42499
	30	2.62718	1.4583		30	1.32196	1.65231
	31	2.75798	1.94264		31	1.62269	1.49506
	32	1.59106	1.27331		32	1.9907	1.35159
	33	1.84795	1.24306		33	1.29475	2.20277
					34	1.65728	1.77665
					35	1.41149	1.87303
					36	1.51241	1.49569
					37	1.9177	1.74165

## Sheet: I stats
Figure 6I	Statistics for Myosin and Baz/Par3 fluorescence intensity on circumferential and radial junctions
	Comparision of radial myo II vs circum. myo II	unpaired t-test
		p < 0.0001
	Comparision of radial Baz vs circum. Baz	unpaired t-test
		p = 0.0765
	Comparision of circ. myo II vs circ. Baz	paired t-test
		p < 0.0001
	Comparision of radial myo II vs radial Baz	paired t-test
		p < 0.0001
