# Supplementary material for: Radially patterned cell behaviours during tube budding from an epithelium
Source: eLife. 2018 Jul 17;7:e35717. doi: 10.7554/eLife.35717 (PMC6089598; doi:10.7554/eLife.35717)
Supplement: Figure 8—figure supplement 2—source data 1. — Related to Figure 8—figure supplement 2D–E. [file elife-35717-fig8-figsupp2-data1.xlsx]

## Sheet: D
Figure 8 supplement 2D'			Instantaneous strain rate (pp per min) for cells near to pit [rad]
		Tissue SRT				Cell shape SRT				Intercalation SRT
	Time	lower CI	Mean	upper CI	N	lower CI	Mean	upper CI	N	lower CI	Mean	upper CI	N
	-18	-0.00394856	-0.000520963	0.00290663	27	-0.00277948	-1.42e-05	0.00275111	27	-0.00123123	0.00143159	0.00409442	27
	-13.5	-0.00151263	0.000654675	0.00282198	161	0.00132973	0.00321145	0.00509316	161	-0.00457693	-0.003196	-0.00181507	161
	-9	0.00180015	0.00391431	0.00602847	248	0.000200693	0.00222055	0.00424041	248	-0.00103187	0.000528216	0.0020883	248
	-4.5	-0.000664017	0.00142672	0.00351746	269	0.000547132	0.00244688	0.00434663	269	-0.00211112	-0.00052815	0.00105482	269
	0	-0.00476851	-0.0020031	0.000762304	215	-0.00285502	-0.000593455	0.00166811	215	-0.00269664	-0.000672015	0.00135261	215
	4.5	-0.000196588	0.00210319	0.00440296	238	-0.000179748	0.00176486	0.00370947	238	-0.000484673	0.00118245	0.00284957	238
	9	-0.00432979	-0.00171412	0.000901556	233	-0.00371238	-0.00190297	-9.36e-05	233	-0.000548186	0.00119995	0.00294808	233
	13.5	-0.0051509	-0.00223229	0.000686331	186	0.00130656	0.00354004	0.00577351	186	-0.00487808	-0.00301182	-0.00114556	186
	18	-0.00622301	-0.00219594	0.00183113	85	-0.00313513	-0.000464604	0.00220593	85	-0.00506024	-0.00214772	0.000764798	85

## Sheet: D stats
Figure 8 supplement 2D'			Statistics for instantaneous strain rate (pp per min) for cells near to pit [rad]
	Tissue SRT compared to Cell Shape SRT				Tissue SRT compared to Intercalation SRT
		Time	pvalues			Time	pvalues
		-18	0.908851			-18	0.654798
		-13.5	0.203902			-13.5	0.116878
		-9	0.0698063			-9	0.00515975
		-4.5	0.402949			-4.5	0.107245
		0	0.787077			0	0.180382
		4.5	0.64058			4.5	0.568477
		9	0.844522			9	0.0315187
		13.5	0.00176134			13.5	0.613639
		18	0.42549			18	0.947174

## Sheet: D dash
Figure 8 supplement 2D'	Instantaneous strain rate (pp per min) for cells near to pit [cir]
		Tissue SRT				Cell shape SRT				Intercalation SRT
	Time	lower CI	Mean	upper CI	N	lower CI	Mean	upper CI	N	lower CI	Mean	upper CI	N
	-18	-0.00951648	-0.00651896	-0.00352144	27	-0.00518704	-0.00227778	0.000631484	27	-0.00409446	-0.00143163	0.0012312	27
	-13.5	0.00243935	0.00445513	0.00647091	161	-0.00097762	0.000563905	0.00210543	161	0.00181506	0.00319599	0.00457692	161
	-9	0.00110993	0.00341932	0.00572872	248	0.00104667	0.00296422	0.00488178	248	-0.00208829	-0.000528208	0.00103188	248
	-4.5	0.000912581	0.00327923	0.00564587	269	0.000993361	0.00271734	0.00444133	269	-0.00105482	0.000528147	0.00211112	269
	0	-0.000998148	0.00186281	0.00472376	215	4.02e-05	0.0020531	0.00406604	215	-0.00135262	0.000672009	0.00269663	215
	4.5	-0.00245474	7.41e-05	0.00260298	238	-0.000165963	0.00178111	0.00372818	238	-0.00284957	-0.00118245	0.000484677	238
	9	-0.00142374	0.00133884	0.00410143	233	0.00138831	0.00341098	0.00543366	233	-0.00294807	-0.00119994	0.000548192	233
	13.5	-0.0051504	-0.00276174	-0.00037309	186	-0.00524119	-0.00317401	-0.00110683	186	0.00114556	0.00301182	0.00487808	186
	18	0.0016882	0.00607067	0.0104531	85	-1.39e-06	0.00258139	0.00516417	85	-0.000764798	0.00214772	0.00506024	85

## Sheet: D dash stats
Figure 8 supplement 2D'			Statistics for instantaneous strain rate (pp per min) for cells near to pit [cir]
			Tissue SRT compared to Cell Shape SRT				Tissue SRT compared to Intercalation SRT
				Time	pvalues			Time	pvalues
				-18	0.314659			-18	0.210229
				-13.5	0.0454135			-13.5	0.879746
				-9	0.950049			-9	0.0020816
				-4.5	0.660599			-4.5	0.0532665
				0	0.623871			0	0.510813
				4.5	0.1668			4.5	0.304531
				9	0.110626			9	0.0391487
				13.5	0.862486			13.5	0.000258485
				18	0.145929			18	0.113887

## Sheet: E
Figure 8 supplement 2E			Instantaneous strain rate (pp per min) for cells far from pit [rad]
		Tissue SRT				Cell shape SRT				Intercalation SRT
	Time	lower CI	Mean	upper CI	N	lower CI	Mean	upper CI	N	lower CI	Mean	upper CI	N
	-18	-0.00171309	0.00194354	0.00560017	52	-0.00185526	0.000389538	0.00263433	52	-0.000414598	0.00105846	0.00253152	52
	-13.5	-0.00173321	-0.000222699	0.00128781	343	-0.00270817	-0.0014024	-9.66e-05	343	-7.06e-05	0.000968911	0.00200841	343
	-9	0.00203918	0.00341532	0.00479146	626	0.00203	0.00311761	0.00420521	626	-0.0014933	-0.000518314	0.000456676	626
	-4.5	0.00246748	0.00374767	0.00502785	735	0.00170371	0.00283554	0.00396736	735	5.34e-05	0.000988949	0.00192452	735
	0	0.00328823	0.00485392	0.00641961	615	0.00159937	0.00275779	0.0039162	615	0.000223486	0.00122395	0.00222441	615
	4.5	0.0018494	0.00348338	0.00511735	706	0.000974577	0.00222793	0.00348129	706	-0.000138949	0.000881616	0.00190218	706
	9	-0.000828602	0.000701391	0.00223138	655	-0.00193599	-0.000720515	0.000494958	655	-9.45e-05	0.000980089	0.00205463	655
	13.5	0.000297163	0.00188323	0.00346929	550	0.00149358	0.00278133	0.00406909	550	-0.00208523	-0.000975354	0.000134526	550
	18	0.00159678	0.00370587	0.00581496	239	0.00087049	0.00260789	0.00434529	239	-0.000815458	0.000855525	0.00252651	239

## Sheet: E stats
Figure 8 supplement 2E'	Statistics for instantaneous strain rate (pp per min) for cells far from pit [rad]
	Tissue SRT compared to Cell Shape SRT				Tissue SRT compared to Intercalation SRT
		Time	pvalues			Time	pvalues
		-18	0.718121			-18	0.823039
		-13.5	0.204384			-13.5	0.763198
		-9	0.899152			-9	0.000126914
		-4.5	0.246108			-4.5	3.02e-05
		0	0.173051			0	0.00326778
		4.5	0.169382			4.5	0.00599388
		9	0.0982028			9	0.834009
		13.5	0.395709			13.5	0.00624672
		18	0.446594			18	0.0350571

## Sheet: E dash
Figure 8 supplement 2E'	Instantaneous strain rate (pp per min) for cells far from pit [cir]
		Tissue SRT				Cell shape SRT				Intercalation SRT
	Time	lower CI	Mean	upper CI	N	lower CI	Mean	upper CI	N	lower CI	Mean	upper CI	N
	-18	-0.00561671	-0.00385833	-0.00209995	52	-0.00429528	-0.00255342	-0.000811572	52	-0.00253155	-0.00105848	0.000414585	52
	-13.5	0.000412112	0.00178777	0.00316343	343	0.0008858	0.00214897	0.00341214	343	-0.00200841	-0.000968909	7.06e-05	343
	-9	-0.000289866	0.00103934	0.00236855	626	-0.00118614	-2.84e-05	0.0011293	626	-0.000456678	0.000518313	0.0014933	626
	-4.5	0.001551	0.00284203	0.00413306	735	0.00297269	0.0040795	0.00518633	735	-0.00192452	-0.000988947	-5.34e-05	735
	0	0.00143515	0.00278358	0.00413202	615	0.00250441	0.00372409	0.00494377	615	-0.00222441	-0.00122395	-0.000223486	615
	4.5	0.000434244	0.0018435	0.00325275	706	0.0019917	0.00307587	0.00416003	706	-0.00190218	-0.000881616	0.000138949	706
	9	-0.000772962	0.000619189	0.00201134	655	0.000264551	0.0014312	0.00259785	655	-0.00205463	-0.00098009	9.45e-05	655
	13.5	0.000140991	0.00155578	0.00297057	550	-0.000501684	0.000685817	0.00187332	550	-0.000134526	0.000975354	0.00208523	550
	18	-0.001241	0.000947852	0.00313671	239	-0.000277221	0.00164598	0.00356918	239	-0.00252651	-0.000855525	0.000815458	239

## Sheet: E dash stats
Figure 8 supplement 2E'			Statistics for instantaneous strain rate (pp per min) for cells far from pit [cir]
	Tissue SRT compared to Cell Shape SRT				Tissue SRT compared to Intercalation SRT
		Time	pvalues			Time	pvalues
		-18	0.599186			-18	0.225146
		-13.5	0.437144			-13.5	0.000189042
		-9	0.117901			-9	0.217387
		-4.5	0.111216			-4.5	4.72471e-07
		0	0.283764			0	1.23676e-09
		4.5	0.187382			4.5	0.000846491
		9	0.295637			9	0.0796651
		13.5	0.348096			13.5	0.334357
		18	0.713184			18	0.177163
