# Supplementary material for: Radially patterned cell behaviours during tube budding from an epithelium
Source: eLife. 2018 Jul 17;7:e35717. doi: 10.7554/eLife.35717 (PMC6089598; doi:10.7554/eLife.35717)
Supplement: Figure 8—source data 1. — Related to Figure 8E and F. [file elife-35717-fig8-data1.xlsx]

## Sheet: E
Figure 7E	Cumulative Tissue strain rate (pp per min) for cells near to pit
	Tissue SRT [rad]			Tissue SRT [cir]
	Time	WT	fkh6	Time	WT	fkh6
	-18	1.0108	0.9977	-18	0.9784	0.9711
	-13.5	0.9872	1.0006	-13.5	0.9498	0.9908
	-9	0.9765	1.0184	-9	0.9296	1.0061
	-4.5	0.9661	1.0249	-4.5	0.8932	1.0211
	0	0.9408	1.0157	0	0.8651	1.0297
	4.5	0.9028	1.0254	4.5	0.8258	1.03
	9	0.8712	1.0175	9	0.79	1.0362
	13.5	0.8427	1.0074	13.5	0.7502	1.0234
	18	0.8303	0.9974	18	0.7024	1.0518

## Sheet: E stats
Figure 7E	Statistics for instantaneous tissue strain rate (pp per min) for cells near to pit
	[rad] WT compared to fkh6				[cir] WT compared to [cir] fkh6
		Time	pvalues			Time	pvalues
		-18	0.545			-18	0.689716
		-13.5	0.0144171			-13.5	0.000739523
		-9	7.73375e-05			-9	0.0178971
		-4.5	0.0225932			-4.5	7.26e-09
		0	0.290231			0	0.00160983
		4.5	0.000116798			4.5	0.00905091
		9	0.227409			9	8.7e-05
		13.5	0.521657			13.5	0.104065
		18	0.995948			18	0.00307496

## Sheet: E dash
Figure 7E'	Cumulative Cell shape strain rate (pp per min) for cells near to pit
	Cell shape SRT [rad]			Cell shape SRT [cir]
	Time	WT	fkh6	Time	WT	fkh
	-18	1.0011	0.9999	-18	0.9757	0.9898
	-13.5	0.9844	1.0145	-13.5	0.942	0.9923
	-9	0.9664	1.0247	-9	0.9251	1.0056
	-4.5	0.9438	1.036	-4.5	0.9011	1.018
	0	0.9199	1.0333	0	0.8733	1.0275
	4.5	0.8776	1.0415	4.5	0.8426	1.0357
	9	0.8469	1.0326	9	0.8162	1.0518
	13.5	0.8331	1.0492	13.5	0.7816	1.0368
	18	0.8023	1.047	18	0.7351	1.049

## Sheet: E dash stats
Figure 7E'	Statistics for instantaneous Cell shape strain rate (pp per min) for cells near to pit
	[rad] WT compared to fkh6				[cir] WT compared to [cir] fkh6
		Time	pvalues			Time	pvalues
		-18	0.9135			-18	0.49388
		-13.5	0.00581013			-13.5	0.00273635
		-9	0.0229193			-9	1.17e-06
		-4.5	0.00141044			-4.5	4.25e-07
		0	0.0526192			0	0.000875671
		4.5	0.000404783			4.5	0.0039369
		9	0.0516101			9	0.000379817
		13.5	0.100573			13.5	0.270314
		18	0.144699			18	8.64e-08

## Sheet: E dash dash
Figure 7E''	Cumulative Intercalation strain rate (pp per min) for cells near to pit
	Intercalation SRT [rad]			Intercalation SRT [cir]
	Time	WT	fkh6	Time	WT	fkh6
	-18	1.0013	1.0065	-18	0.9987	0.9936
	-13.5	0.9945	0.9921	-13.5	1.0056	1.008
	-9	0.999	0.9945	-9	1.001	1.0056
	-4.5	1.0103	0.9921	-4.5	0.9898	1.008
	0	1.0104	0.9891	0	0.9897	1.011
	4.5	1.0174	0.9944	4.5	0.9829	1.0057
	9	1.0246	0.9998	9	0.9759	1.0002
	13.5	1.018	0.9863	13.5	0.9823	1.0139
	18	1.0288	0.9768	18	0.9721	1.0237

## Sheet: E dash dash stats
Figure 7E''	Statistics for instantaneous Intercalation strain rate (pp per min) for cells near to pit
	[rad] WT compared to fkh6				[cir] WT compared to [cir] fkh6
		Time	pvalues			Time	pvalues
		-18	0.714455			-18	0.714447
		-13.5	0.456253			-13.5	0.456253
		-9	0.750749			-9	0.750747
		-4.5	0.0251433			-4.5	0.0251436
		0	0.752288			0	0.75229
		4.5	0.906705			4.5	0.906709
		9	0.6485			9	0.648499
		13.5	0.415501			13.5	0.415501
		18	0.268179			18	0.268179

## Sheet: F
Figure 7F	Cumulative Tissue strain rate (pp per min) for cells far from pit
	Tissue SRT [rad]			Tissue SRT [cir]
	Time	WT	fkh6	Time	WT	fkh6
	-18	1.0395	1.0088	-18	0.9709	0.9828
	-13.5	1.0474	1.0078	-13.5	0.9594	0.9907
	-9	1.0544	1.0234	-9	0.951	0.9954
	-4.5	1.0735	1.0408	-4.5	0.939	1.0082
	0	1.0884	1.0638	0	0.9222	1.0209
	4.5	1.1062	1.0806	4.5	0.9142	1.0294
	9	1.1319	1.084	9	0.8924	1.0323
	13.5	1.131	1.0932	13.5	0.8741	1.0395
	18	1.165	1.1116	18	0.833	1.044

## Sheet: F stats
Figure 7F	Statistics for instantaneous tissue strain rate (pp per min) for cells far from pit
	[rad] WT compared to fkh6				[cir] WT compared to [cir] fkh6
		Time	pvalues			Time	pvalues
		-18	0.0934734			-18	0.822887
		-13.5	0.67423			-13.5	0.0117984
		-9	0.608896			-9	0.0309007
		-4.5	0.918304			-4.5	0.000246351
		0	0.562911			0	1.4e-05
		4.5	0.789832			4.5	0.0138327
		9	0.0815689			9	0.024882
		13.5	0.637297			13.5	0.000192119
		18	0.294531			18	0.0209513

## Sheet: F dash
Figure 7F'	Cumulative Cell shape strain rate (pp per min) for cells far from pit
	Cell shape SRT [rad]			Cell shape SRT [cir]
	Time	WT	fkh	Time	WT	fkh
	-18	1.0136	1.0018	-18	0.9947	0.9886
	-13.5	1.0151	0.9955	-13.5	0.9854	0.9982
	-9	1.0104	1.0095	-9	0.9744	0.9981
	-4.5	1.0161	1.0225	-4.5	0.9696	1.0165
	0	1.0139	1.0352	0	0.9689	1.0337
	4.5	1.0096	1.0457	4.5	0.9722	1.0481
	9	1.0143	1.0423	9	0.9627	1.0549
	13.5	1.0084	1.0554	13.5	0.9544	1.0582
	18	1.0137	1.0679	18	0.9264	1.066

## Sheet: F dash stats
Figure 7F'	Statistics for instantaneous Cell shape strain rate (pp per min) for cells far from pit
	[rad] WT compared to fkh6				[cir] WT compared to [cir] fkh6
		Time	pvalues			Time	pvalues
		-18	0.726213			-18	0.559544
		-13.5	0.638827			-13.5	0.146604
		-9	0.0718227			-9	0.0993998
		-4.5	0.512941			-4.5	0.00313673
		0	0.12422			0	0.0875123
		4.5	0.223691			4.5	0.0864746
		9	0.445334			9	0.175593
		13.5	0.201719			13.5	0.196903
		18	0.608957			18	0.0636762

[truncated: 2 more sheets: F dash dash, F dash dash stats]
