# Supplementary material for: Radially patterned cell behaviours during tube budding from an epithelium
Source: eLife. 2018 Jul 17;7:e35717. doi: 10.7554/eLife.35717 (PMC6089598; doi:10.7554/eLife.35717)
Supplement: Figure 9—source data 1. — Related to Figure 9A–B and E–F. [file elife-35717-fig9-data1.xlsx]

## Sheet: A
Figure 9A	Absolute unipolarity [pp per min]
		Absolute unipolarity WT [radial]				Absolute unipolarity WT [circumferential]
	Time	lower CI	Mean	upper CI	N	lower CI	Mean	upper CI	N
	-13.5	0.100241	0.106956	0.113671	207	0.101807	0.109646	0.117485	207
	-9	0.100148	0.109068	0.117988	522	0.0961263	0.10415	0.112173	522
	-4.5	0.107354	0.112799	0.118244	1115	0.0942854	0.0993496	0.104414	1115
	0	0.107182	0.113342	0.119502	918	0.0926493	0.0982874	0.103926	918
	4.5	0.110393	0.116216	0.12204	1091	0.0885374	0.0934503	0.0983632	1091
	9	0.110541	0.11729	0.124039	1125	0.0959934	0.102036	0.108078	1125
	13.5	0.124652	0.132187	0.139722	1047	0.100389	0.10713	0.113871	1047
	18	0.117201	0.12884	0.14048	484	0.0958842	0.105401	0.114919	484
		Absolute unipolarity fkh6 [radial]				Absolute unipolarity fkh6 [circumferential]
	Time	lower CI	Mean	upper CI	N	lower CI	Mean	upper CI	N
	-13.5	0.0508628	0.0560369	0.061211	528	0.0592331	0.0646926	0.0701521	528
	-9	0.0483204	0.0523726	0.0564248	783	0.0557829	0.0604295	0.065076	783
	-4.5	0.0487375	0.053053	0.0573686	815	0.0555884	0.0602449	0.0649013	815
	0	0.0500177	0.0546798	0.0593418	712	0.0491816	0.0540643	0.0589469	712
	4.5	0.0486307	0.0524141	0.0561976	809	0.0514218	0.0557631	0.0601043	809
	9	0.0539776	0.0585427	0.0631077	786	0.0508847	0.0553167	0.0597487	786
	13.5	0.0568503	0.061808	0.0667656	708	0.0512539	0.0555163	0.0597788	708
	18	0.0520114	0.0590424	0.0660733	307	0.0514038	0.0578696	0.0643354	307

## Sheet: A stats
Figure 9A	Statistics for absolute unipolarity [pp per min]
	[radial] WT compared to [radial] fkh6				[circumferential] WT compared to fkh6 [circumferential]
		Time	pvalues			Time	pvalues
		-13.5	3.52805e-06			-13.5	3.22e-10
		-9	4.97399e-09			-9	6.32e-11
		-4.5	9.31435e-37			-4.5	3.32e-08
		0	3.13078e-35			0	7.23e-07
		4.5	1.4381e-42			4.5	1.1e-06
		9	4.81525e-15			9	5.45e-22
		13.5	9.41742e-17			13.5	4.54e-31
		18	5.69402e-20			18	1.42e-12

## Sheet: B
Figure 9B	Bipolarity [pp per min]
		Bipolarity WT [radial]				Bipolarity WT [circumferential]
	Time	lower CI	Mean	upper CI	N	lower CI	Mean	upper CI	N
	-13.5	-0.00595225	0.00298465	0.0119215	207	-0.0119215	-0.00298463	0.00595226	207
	-9	0.00511631	0.0146126	0.0241089	522	-0.0241089	-0.0146126	-0.00511631	522
	-4.5	0.0148198	0.0208742	0.0269286	1115	-0.0269286	-0.0208742	-0.0148198	1115
	0	0.0118092	0.0185266	0.025244	918	-0.025244	-0.0185266	-0.0118092	918
	4.5	0.0111191	0.017232	0.023345	1091	-0.023345	-0.017232	-0.0111191	1091
	9	0.00608427	0.0131562	0.0202281	1125	-0.0202281	-0.0131562	-0.00608428	1125
	13.5	0.00566403	0.0132497	0.0208354	1047	-0.0208354	-0.0132497	-0.00566403	1047
	18	0.00984607	0.02115	0.0324539	484	-0.0324539	-0.02115	-0.00984607	484
		Bipolarity fkh6 [radial]				Bipolarity fkh6 [circumferential]
	Time	lower CI	Mean	upper CI	N	lower CI	Mean	upper CI	N
	-13.5	-0.00511791	0.000752022	0.00662196	528	-0.00662195	-0.000752015	0.00511792	528
	-9	-0.00912925	-0.00430169	0.000525866	783	-0.000525865	0.0043017	0.00912925	783
	-4.5	-0.00129622	0.00348352	0.00826327	815	-0.00826327	-0.00348353	0.00129622	815
	0	-0.00242623	0.00259861	0.00762344	712	-0.00762344	-0.0025986	0.00242623	712
	4.5	-0.00258081	0.00196411	0.00650902	809	-0.00650902	-0.00196411	0.00258081	809
	9	-0.00126619	0.00388406	0.00903431	786	-0.0090343	-0.00388405	0.0012662	786
	13.5	-0.00290327	0.00222794	0.00735914	708	-0.00735914	-0.00222793	0.00290327	708
	18	-0.000772558	0.00639573	0.013564	307	-0.013564	-0.00639572	0.000772565	307

## Sheet: B stats
Figure 9B	Statistics for bipolarity [pp per min]
	[radial] WT compared to [radial] fkh6				[circumferential] WT compared to fkh6 [circumferential]
		Time	pvalues			Time	pvalues
		-13.5	0.971431			-13.5	0.971432
		-9	2.5e-06			-9	2.5e-06
		-4.5	0.00038391			-4.5	0.000383905
		0	0.0160983			0	0.0160982
		4.5	0.00295084			4.5	0.00295085
		9	0.0869299			9	0.0869292
		13.5	0.105831			13.5	0.105831
		18	0.227143			18	0.227143

## Sheet: E
Figure 9E	Cumulative neighbour gains
	radial gains			circumferential gains
	Time	WT	fkh6	Time	WT	fkh6
	-16.5	0	1	-16.5	3	3
	-13.5	6	4	-13.5	15	6
	-10.5	16	18	-10.5	36	11
	-7.5	25	28	-7.5	64	21
	-4.5	42	37	-4.5	89	33
	-1.5	57	46	-1.5	115	43
	1.5	77	70	1.5	155	70
	4.5	89	77	4.5	180	85
	7.5	103	90	7.5	199	97
	10.5	117	103	10.5	233	116
	13.5	125	113	13.5	243	125
	16.5	130	122	16.5	256	137

## Sheet: F
Figure 9F	Cumulative proportion of circumferential productive neighbour gains
	Cumulative pp of productive neigh gains
	Time	WT	fkh6
	-16.5	0.0122449	0.00980392
	-13.5	0.0187951	0.00980392
	-10.5	0.026591	-0.0026874
	-7.5	0.0369877	-0.0026874
	-4.5	0.040952	0.0012496
	-1.5	0.0460037	0.00252919
	1.5	0.0535169	0.00497717
	4.5	0.0617239	0.0158615
	7.5	0.0647469	0.0145228
	10.5	0.0800961	0.0216913
	13.5	0.0826734	0.0199119
	16.5	0.0930833	0.0245273

## Sheet: F stats
Figure 9F	Statistics for proportion of circumferential productive neighbour gains
	Two-sample Kolmogorov-Smirnov test comparing WT and fkh6
	p = 0.0191
	D = 0.5833
